1 **Resource competition predicts assembly of *in vitro* gut bacterial communities**

2 Po-Yi Ho<sup>1,+,\*</sup>, Taylor H. Nguyen<sup>1,+</sup>, Juan M. Sanchez<sup>2</sup>, Brian C. DeFelice<sup>2</sup>, Kerwyn Casey  
3 Huang<sup>1,2,3,\*</sup>

4  
5 <sup>1</sup>Department of Bioengineering, Stanford University, Stanford, CA, USA

6 <sup>2</sup>Chan Zuckerberg Biohub, San Francisco, CA 94158

7 <sup>3</sup>Department of Microbiology and Immunology, Stanford University School of Medicine,  
8 Stanford, CA 94305, USA

9

10 +: Co-first authors

11 \*: Correspondence to [poyiho@stanford.edu](mailto:poyiho@stanford.edu) and [kchuang@stanford.edu](mailto:kchuang@stanford.edu)

12

13 *Running title:* Resource competition predicts community assembly

14

15 *Keywords:* interspecies interaction mechanisms; gut microbiome; microbial community  
16 dynamics; spent media; conditioned media; untargeted metabolomics; consumer-  
17 resource models

18 **ABSTRACT**

19 Members of microbial communities interact via a plethora of mechanisms, including  
20 resource competition, cross-feeding, and pH modulation. However, the relative  
21 contributions of these mechanisms to community dynamics remain uncharacterized.  
22 Here, we develop a framework to distinguish the effects of resource competition from  
23 other interaction mechanisms by integrating data from growth measurements in spent  
24 media, synthetic community assembly, and metabolomics with consumer-resource  
25 models. When applied to human gut commensals, our framework revealed that resource  
26 competition alone could explain most pairwise interactions. The resource-competition  
27 landscape inferred from metabolomic profiles of individual species predicted assembly  
28 compositions, demonstrating that resource competition is a dominant driver of *in vitro*  
29 community assembly. Moreover, the identification and incorporation of interactions other  
30 than resource competition, including pH-mediated effects and cross-feeding, improved  
31 model predictions. Our work provides an experimental and modeling framework to  
32 characterize and quantify interspecies interactions *in vitro* that should advance  
33 mechanistically principled engineering of microbial communities.

## 34 INTRODUCTION

35 Microbial communities are important for host health and environmental functions (Cho  
36 and Blaser, 2012; Singh et al., 2020), but their complex dynamics remain difficult to  
37 predict and engineer (Widder et al., 2016). A major challenge is that community members  
38 affect each other through a plethora of interaction mechanisms, including nutrient  
39 competition (Dal Bello et al., 2021; Hammarlund et al., 2021; Niehaus et al., 2019),  
40 metabolic cross-feeding (Adamowicz et al., 2018; Amarnath et al., 2021), pH modulation  
41 (Aranda-Díaz et al., 2020; Ratzke and Gore, 2018), toxins (Piccardi et al., 2019), and  
42 physical inhibition through secretion systems (Verster et al., 2017). The effects of many  
43 interaction mechanisms have been individually characterized in isolated contexts, but  
44 their relative contributions to the overall dynamics of a diverse community remain unclear  
45 in most cases.

46  
47 Despite the complex nature of many natural microbiotas, community dynamics can often  
48 be captured by generalized Lotka-Volterra (gLV) models that describe interspecies  
49 interactions via phenomenological pairwise interaction coefficients (Faust and Raes,  
50 2012; Fisher and Mehta, 2014; Venturelli et al., 2018; Xiao et al., 2017). These  
51 coefficients have often been inferred to be negative across a wide range of systems  
52 involving growth *in vitro* (Foster and Bell, 2012; Weiss et al., 2021), indicating that  
53 community members tend to inhibit one another. Competition for shared nutrients has  
54 been hypothesized to be a prevalent mechanism that generates negative interactions.  
55 Indeed, consumer-resource (CR) models in which interspecies interactions are mediated  
56 solely by resource competition can be mapped to gLV models with negative coefficients  
57 near steady state (Chesson, 1990; Cui et al., 2021; Xiao *et al.*, 2017). Nonetheless, other  
58 mechanisms can play important roles in community assembly (Cordero and Datta, 2016;  
59 Venturelli *et al.*, 2018; Weiss *et al.*, 2021), and positive interactions can also be common  
60 in some situations (Kehe et al.). We therefore sought to clarify the origins of interactions  
61 by developing an integrated theoretical and experimental framework to disentangle the  
62 extent of resource competition from other interaction mechanisms.

63

64 To do so, we used CR models to integrate growth measurements in pairwise spent media  
65 (Biggs et al., 2017; Weiss *et al.*, 2021), metabolomics (Han et al., 2021; Medlock et al.,  
66 2018), and 16S rRNA gene sequencing of assemblies of isolates. These techniques have  
67 been used previously to identify metabolites that mediate interspecies interactions (Biggs  
68 *et al.*, 2017; Medlock *et al.*, 2018), as well as to parametrize dynamical models for  
69 communities of a few species (Gowda et al., 2022; Hammarlund *et al.*, 2021; Hart et al.,  
70 2019; Piccardi *et al.*, 2019). Here, we extend these approaches to dissect interactions  
71 and measure the extent of resource competition in diverse communities and in contexts  
72 that mimic the complexity of natural environments like the mammalian gut.

73  
74 We studied a collection of gut bacterial isolates that assembles into a community whose  
75 composition when grown *in vitro* can resemble the gut microbiota of mice colonized with  
76 the human fecal sample from which the isolates were obtained (Aranda-Díaz et al., 2022;  
77 Ng et al., 2019). We focused on 15 species that are representative of the phylogenetic  
78 diversity of human gut microbiotas (Fig. 1A), and together reconstitute ~70% of the  
79 abundance of the parent community (Aranda-Díaz *et al.*, 2022). We show that  
80 metabolomic profiles of the spent culture supernatants from each isolate can predict the  
81 amount of growth in pairwise spent media, and that these experimental data can be used  
82 to parametrize a coarse-grained CR model that accurately predicts community assembly.  
83 Similar qualitative conclusions were obtained in different growth conditions, suggesting  
84 that resource competition is generally a predominant factor driving *in vitro* community  
85 dynamics. Furthermore, we demonstrate a rational process to identify other interaction  
86 mechanisms, including cross-feeding and pH-mediated interactions, and to incorporate  
87 them into the model to improve predictions.

## 88 RESULTS

89

### 90 ***A coarse-grained CR model for inferring the origins of interspecies interactions***

91 To characterize interspecies interactions in our model *in vitro* community (Fig. 1A), we  
92 measured the growth of each of the 15 species in isolation and in pairwise co-culture with  
93 each other species (Fig. 1B, Methods). All experiments were performed using the  
94 complex medium Brain Heart Infusion (BHI), which supported the growth of all isolates.  
95 In agreement with previous *in vitro* studies involving species from wide-ranging  
96 microbiotas, the gut commensals studied here typically inhibited the growth of one  
97 another in the sense that co-culture yields were less than the sum of the individual yields,  
98 as measured by optical density (Fig. 1C). Unless otherwise specified, all measurements  
99 were taken in stationary phase. Co-cultures were passaged until an ecological steady  
100 state was reached, in which the growth dynamics in successive passages were virtually  
101 identical (Methods). For each pair of species, we refer to the difference between co-  
102 culture yield and the sum of the two individual yields, normalized by the co-culture yield,  
103 as the null interaction score. The average null interaction score was -0.34 across the 105  
104 pairs, out of which 93 exhibited negative scores (Fig. 1C). Although indicative of prevalent  
105 inhibition, negative null interaction scores cannot differentiate among the variety of  
106 inhibitory mechanisms that might be responsible.

107

108 Since resource competition is likely a common form of interspecies inhibition, we sought  
109 to quantify its extent by measuring the growth of each species in medium conditioned  
110 (hereafter “spent”, Methods) by the growth of each other species individually. Spent  
111 media exclude direct and physical effects that would emerge due to the presence of other  
112 species, but maintain environmentally mediated interactions, including resource  
113 competition, pH changes, toxins, and metabolic cross-feeding. To interpret the results,  
114 we considered a consumer-resource (CR) model in which resources are substitutable  
115 (i.e., any of the resources consumed by a species can support its growth), and are  
116 completely consumed and converted to biomass during growth to stationary phase (Erez  
117 et al., 2020; Ho et al., 2022). We coarse-grained the model by grouping metabolites that  
118 are consumed by the same set of species into one effective resource. While not a

119 necessary assumption at this stage, coarse-graining simplified the interpretation of  
120 pairwise experiments and was important for analyzing assemblies of more than two  
121 species. A community of two species is then described by three effective resources: two  
122 specifically consumed by one of the two species, and one shared by both species.  
123 Metabolites that cannot be consumed by either species are ignored. With this coarse-  
124 graining, species A grown individually will consume its specific resource and the shared  
125 resource, leaving the other resource specific to species B in the spent medium, while all  
126 three resources will be consumed in a co-culture of the two species (Fig. 1B). Hence, if  
127 all species convert resources into biomass yield with the same efficiency, then the model  
128 predicts a simple relation linking the co-culture yield  $[A + B]^{\text{co}}$  to isolate growth in fresh  
129 and spent media,

$$130 \quad [A + B]^{\text{co}} = A + B_A = B + A_B, (1)$$

131 where  $A$  and  $A_B$  are the yields of A in isolation and in the medium spent by B, respectively,  
132 and similarly for  $B$  and  $B_A$ . Small values of  $r(A, B) = [A + B]^{\text{co}} - (A + B_A)$  and  $r(B, A) =$   
133  $[A + B]^{\text{co}} - (B + A_B)$ , which we refer to as resource competition residues, imply that the  
134 model can capture the assembly of the co-culture, presumably because interactions  
135 between A and B are dominated by resource competition. By contrast, large residues may  
136 highlight deviations due to interactions other than resource competition or differences in  
137 efficiency of resource conversion. Note that the possibility that species pairs can satisfy  
138 Eq. 1 while interacting via mechanisms other than resource competition cannot be ruled  
139 out, and that the two residues  $r(A, B)$  and  $r(B, A)$  for a pair of species can be asymmetric,  
140 potentially reflecting the directionality of interactions mediated by spent media. In addition  
141 to the assumptions above, Eq. 1 also ignores certain biological details, including  
142 saturation kinetics and hierarchical resource preferences. Nonetheless, Eq. 1 provides a  
143 useful baseline to interrogate the extent of resource competition as we demonstrate  
144 below.

145

### 146 ***Most pairwise interactions can be described by resource competition***

147 To quantify the relative contribution of resource competition to co-culture assembly, we  
148 applied Eq. 1 to interpret our pairwise spent media experiments. By contrast to the  
149 distribution of null interaction scores, the distribution of normalized resource competition

150 residues  $r(A,B)/[A+B]^{\text{CO}}$  and  $r(B,A)/[A+B]^{\text{CO}}$  was centered about zero with mean  
151 0.03 and standard deviation 0.21 across the 210 ordered pairs (Fig. 1D). Simulations of  
152 random instances of the CR models used to derive Eq. 1 (Methods) produced  
153 distributions of normalized residues centered around zero, as expected, and inclusion of  
154 5% measurement noise, approximately equal to the standard error of the mean yields in  
155 our experimental data, broadened the distribution of residues to have maximum  
156 magnitude  $\sim 0.2$  (Fig. 1E, Methods). We therefore refer to a residue as near-zero if its  
157 magnitude is  $< 0.2$ . Almost 3/4 of all residues (155/210) were near-zero and more than  
158 half of pairs (57/105) exhibited near-zero values for both normalized residues (Fig. 1D,E).  
159 Moreover, as a corollary to Eq. 1, the model predicts that the yield of species A in a 1:1  
160 mixture of the spent media of B and C should be the average of the yields of A in each  
161 spent medium individually (Methods). This corollary was an excellent predictor of  
162 experimental data (Fig. 1F), suggesting that spent media typically did not exert other  
163 effects that would influence the consumption of nutrient mixtures. Taken together, these  
164 results demonstrate that Eq. 1 can describe most pairwise interactions, which suggests  
165 that in this community, resource competition is prominent compared with the contributions  
166 of other interaction mechanisms. Therefore, we will first focus on resource competition  
167 alone, and return to examine other mechanisms afterwards.

168

### 169 ***Metabolomic profiles capture the landscape of resource competition***

170 To further probe the nature of resource competition, we obtained untargeted  
171 metabolomics data via liquid chromatography coupled with tandem mass spectrometry  
172 (LC-MS) from the spent medium of each species (Fig. 2A, Methods). We detected  
173 thousands of features in fresh BHI, of which hundreds could be confidently annotated.  
174 The annotated metabolites included sugars, nucleotides, amino acids, and di- and tri-  
175 peptides, and represented diverse metabolic pathways (Han *et al.*, 2021), suggesting that  
176 our pipeline provides a representative overview of bacterial metabolism. We therefore  
177 hypothesized that the spent media metabolomes reflect the landscape of resource  
178 competition, i.e., the extent of resource sharing among species (niches) as well as the  
179 approximate sizes of individual and shared niches. If true, then it should be possible to  
180 predict growth in spent media based on the metabolomic profiles.

181  
182 To connect metabolomes and growth measurements, we would ideally be able to relate  
183 the ionization intensities of a metabolite as reported by LC-MS to its contribution to  
184 biomass. However, one metabolite can generate multiple features (“peaks”) in LC-MS;  
185 moreover, the conversions from ion intensity to metabolite concentration can differ across  
186 metabolites (Alseekh et al., 2021; Han *et al.*, 2021), and conversions from metabolite  
187 concentration to biomass can differ across species. In any case, these conversion factors  
188 are typically unknown. We reasoned that these details might be secondary to the total  
189 number of metabolites consumed in the limit of many involved metabolites, due to  
190 averaging over variations in these conversion factors. Accordingly, we tested the  
191 hypothesis that biomass is proportional to the number of peaks depleted, as defined  
192 by >100-fold depletion compared to fresh medium (Fig. 2B, Methods). This logic also  
193 predicts that the yield of species A in the spent medium of B should be proportional to the  
194 number of peaks depleted by A but not B. Since this hypothesis does not depend on the  
195 identity of the metabolites, unannotated features were also included to increase the  
196 number of metabolites and metabolic pathways involved. Deviations could be due to  
197 several causes, including biases in the conversions from peak height to concentrations,  
198 differences in the efficiency of biomass production across species, and interactions other  
199 than resource competition. Despite these potential limitations, the resulting predictions  
200 were highly correlated with experimental measurements of biomass yield (Pearson’s  
201 correlation coefficient  $\rho = 0.78$ , Fig. 2C). Analogous predictions for co-cultures and  
202 growth in the spent media of co-cultures were also excellent ( $\rho = 0.65$  and  $0.74$ ,  
203 respectively), and followed the same general trend as in the pairwise spent media  
204 experiments (Fig. 2D,E). Notably, successful predictions for growth in the spent media of  
205 co-cultures indicate that interactions among three species were also captured. These  
206 results further establish the importance of resource competition in this community, and  
207 demonstrate that metabolomic profiles can approximate the resource competition  
208 landscape.

209

210 ***Resource competition predicts community assembly***



211 Having found that resource competition can explain most pairwise interactions, we next  
212 sought to quantify the extent to which resource competition dictates the assembly of more  
213 diverse communities. The complex and undefined nature of many growth media such as  
214 BHI complicates efforts to directly manipulate resource levels. Instead, we reasoned that  
215 if resource competition is a leading driver of community assembly, then a CR model  
216 accounting for only resource competition without other interaction mechanisms should be  
217 able to predict community composition. We assembled subsets of varying sizes from the  
218 15 species, passaged their mixture until they reached an ecological steady state as with  
219 co-cultures, and quantified community composition by 16S rRNA gene sequencing. We  
220 then parametrized a CR model by refining the approximate resource competition  
221 landscape provided by metabolomics using data from spent media experiments and  
222 tested whether it could predict community assembly (Fig. 3A, Methods).

223

224 Specifically, we considered the following CR model,

$$\begin{aligned} 225 \quad \frac{dX_i}{dt} &= X_i \sum_{\mu=1}^M R_{i\mu} Y_{\mu} \theta(t - \tau_i) \\ 226 \quad \frac{dY_{\mu}}{dt} &= -Y_{\mu} \sum_{i=1}^N R_{i\mu} X_i \theta(t - \tau_i). \quad (2) \end{aligned}$$

227 Here,  $X_i$  denotes the abundance of species  $i$ ,  $Y_{\mu}$  the amount of coarse-grained resource  
228  $\mu$ , and  $R_{i\mu}$  the consumption rate of resource  $\mu$  by species  $i$ . In addition,  $\tau_i$  captures the  
229 lag time of species  $i$ , before which it does not grow nor consume resources. Lag time was  
230 implemented in Eq. 2 using a step function  $\theta$ , which is equal to zero if the input is  $<0$  and  
231 equal to one otherwise. Lag times were estimated from growth measurements in  
232 monocultures and assumed to be the same in a community context as in monocultures  
233 (Methods). Eq. 2 explicitly describes the dynamics that gives rise to Eq. 1 in a community  
234 of two species, and like Eq. 1, ignores certain biological details including saturation  
235 kinetics and resource preferences. Nonetheless, the emergent behaviors of Eq. 2 have  
236 been previously shown to be able to quantitatively reproduce experimentally observed  
237 temporal fluctuations among wide-ranging microbiotas (Ho *et al.*, 2022). We simulated  
238 Eq. 2 under serial dilution until species abundances reached an ecological steady state,

239 mimicking our experimental protocol (Methods). The parameters of the model are the  
240 initial resource levels in fresh medium  $Y_\mu^0$  and the consumption rates  $R_{i\mu}$ . For  $N$  species,  
241 there are  $M = 2^N - 1$  species combinations, and hence the same number of potential  
242 coarse-grained resources. Although coarse-graining removes some potential for niche  
243 partitioning by lumping together metabolites that could be consumed at relatively different  
244 rates by different species, it was important to simplify the parametrization process, and in  
245 hindsight, revealed the highly impactful shared niches that substantially affected  
246 community dynamics. Under coarse-graining, the challenge is to infer the  $2^N - 1$   
247 resource levels and  $N \times (2^N - 1)$  consumption rates from the far fewer  $N^2$  growth curves  
248 in spent media and  $N$  metabolomic profiles of the isolates. We decomposed the challenge  
249 into three steps (Methods).

250  
251 First, the subset of coarse-grained niches that have non-zero resource levels  $Y_\mu^0$ , or  
252 equivalently, the subset of consumption rates  $R_{i\mu}$  that are non-zero, was determined from  
253 metabolomics data via coarse-graining as detailed below. Second, given this structure of  
254 resource consumption, the corresponding resource levels in fresh medium  $Y_\mu^0$  were  
255 inferred from the experimentally determined yield of species  $i$  in the spent medium of  $j$ ,  
256 which the model predicts to be  $X_{ij} = \sum_{\mu \in S_i \setminus S_j} Y_\mu^0$  where  $S_i$  is the set of resources  
257 consumed by species  $i$ , and  $\setminus$  denotes the difference between sets – in other words, the  
258 sum is over resources  $\mu$  consumed by  $i$  but not  $j$  such that  $R_{i\mu} > 0$  but  $R_{j\mu} = 0$ . If the  
259 number  $M$  of coarse-grained resources under consideration is less than the number of  
260 measurements  $N^2$ , this problem is constrained and can be best fit by linear regression.  
261 Finally, the consumption rates  $R_{i\mu}$  were inferred from experimentally determined growth  
262 rates, which the model predicts to have a maximum value of  $\lambda_i = \sum_{\mu} R_{i\mu} Y_\mu^0$  for species  $i$   
263 in monoculture. Although a linear regression similar to the one for resource levels can be  
264 carried out using the growth rates in spent media to determine  $R_{i\mu}$ , we decided to simplify  
265 the problem given limitations in the accuracy of growth rate measurements in cultures  
266 with low yield. We assumed that  $R_{i\mu} = R_i^*$  for all resources  $\mu$ , i.e., species  $i$  consumes all  
267 resources that it uses at the same rate (e.g., (Good et al., 2018; Tikhonov and Monasson,  
268 2017)), and hence,  $R_i^* = \lambda_i / \sum_{\mu \in S_i} Y_\mu^0$ .

269

270 Since the latter two steps are simpler to solve, the core challenge is to choose the subset  
271 of consumption rates  $R_{i\mu}$  that are non-zero, i.e., the resource utilization structure.  
272 Crucially, metabolomics data can directly reveal the potential niche overlaps among  
273 multiple species, as demonstrated by their ability to predict growth in spent media (Fig.  
274 2). We therefore used the metabolomics data to guide our choice of the utilization  
275 structure (Fig. 3B). The >15,000 features that were depleted in at least one spent medium  
276 were grouped into 1,211 coarse-grained resource niches (Fig. S1A). Most metabolites  
277 clustered into large groups: the 100 groups with the largest number of constituent  
278 metabolites comprised ~84% of the metabolites (Fig. S1B). Each species was associated  
279 with a set of metabolites that it uniquely depleted, which collectively comprised ~49% of  
280 the metabolites (Fig. S1A). To predict community compositions from these metabolomics-  
281 derived niches, we first restricted our analysis to the resource utilization structure  
282 determined by the 15 species-specific niches and a subset of the remaining niches with  
283 the largest number of constituents, reasoning that they should encode most of the  
284 information about the landscape of resource competition since the number of depleted  
285 peaks was strongly correlated with biomass yield (Fig. 2). We varied the number of niches  
286 included and compared model predictions against 185 assemblies of 2 to 15 species.  
287 Mean model error was minimized for the structure containing the species-specific niches  
288 and 18 of the largest remaining niches (Fig. 3C), which together comprised ~68% of the  
289 metabolites. Remarkably, the inferred resource levels and consumption rates (Fig. 3B,  
290 S2A) predicted assembly compositions with a mean error of  $1.33 \log_2$  fold-change per  
291 species (“doublings per species”; defined as  $\sum_{i=1}^N |\log_2(x_i^{\text{actual}}/x_i^{\text{predicted}})| / N$ , where  $x_i$  is  
292 the relative abundance of species  $i$ , which was set to  $10^{-4}$  if species  $i$  was undetectable),  
293 which was smaller than the error of other models considered, as discussed below (Fig.  
294 3C,D, S2B, Methods). This analysis ignores potential biases that can arise from  
295 conversions between biomass yields, optical density measurements, and 16S counts that  
296 remain challenging to quantify. Nonetheless, the close agreement between the CR model  
297 and experimental observations suggests that resource competition drives community  
298 assembly to a large extent in our system.

299

### 300 ***Properties of resource competition in our community***

301 To further evaluate the relevance of metabolomics-derived niches, we attempted to  
302 predict community compositions using hypothetical structures of resource consumption.  
303 First, we tested a “base” structure that includes only species-specific resources. Next, we  
304 added to the base structure either every coarse-grained resource shared only between  
305 species pairs, or every resource shared across all but one species (Fig. S3A). All three  
306 structures predicted community compositions less accurately (mean error of 1.70, 1.71,  
307 and 2.77 doublings per species, respectively; Fig. 3C) than the CR model including all  
308 species-specific niches and the next 18 largest niches, indicating that the hypothetical  
309 structures failed to fully capture the landscape of resource competition in our community.  
310 In fact, the set of all-but-one niches significantly decreased model performance relative  
311 to the base structure. Thus, the incorporation of low-relevance niches can decrease  
312 model performance despite providing additional degrees of freedom.

313  
314 Having established the relevance of metabolomics-derived niches, we next investigated  
315 their implications for the nature of resource competition in our community. First, the  
316 presence of species-specific niches for all 15 species explained their widespread  
317 coexistence in assemblies because in the absence of other antagonistic interactions,  
318 each species can grow by accessing its exclusive set of metabolites. Given only the  
319 species-specific niches, our modeling framework would infer the species-specific  
320 resource levels, and hence the species abundances in community, to be proportional to  
321 the average yield across monoculture and pairwise spent media for each species. The  
322 ensuing base model predicted assembly compositions to a reasonable degree, although  
323 28% less accurately than the best model (Fig. 3C). This result mechanistically explains a  
324 previous finding that isolate yield correlates with abundance in a community context  
325 (Aranda-Díaz *et al.*, 2022). In addition to the species-specific niches, there was also  
326 substantial resource sharing among groups of species (Fig. 3B). The shared metabolite  
327 groups comprise approximately half of all metabolomic features that were depleted, and  
328 within the inferred model, accounted for approximately half of the total resource levels  
329 (Fig. 3B). Inclusion of shared resources improved model predictions, but prediction error

330 was non-monotonic with respect to the number of niches included (Fig. S3B), highlighting  
331 the combinatorial complexity of the resource competition landscape.

332  
333 A key assumption in our model is that the metabolic functions of individual species remain  
334 unchanged in the context of a community. Several lines of evidence support this  
335 assumption. First, the compositions of the full 15-member community and dropout  
336 assemblies with 14 of the 15 species were well predicted by the CR model with  
337 parameters inferred from mono- and co-cultures (mean error of 1.63 doublings per  
338 species, Fig. S2B), suggesting that the metabolic capacities of the species remained  
339 largely unchanged even in the most complex assemblies possible with the species  
340 considered here. Mixing, or “refilling”, dropout assemblies with the species that was left  
341 out mostly resulted in communities with compositions indistinguishable from the full  
342 community assembled from monocultures (Methods, Fig. S4), in agreement with our CR  
343 model, which predicts that initial abundances do not affect steady-state values. Taken  
344 together, these results imply that community assembly can be accurately represented by  
345 a CR model with fixed parameters regardless of which species are present.

346  
347 ***Comparisons with other models***  
348 To test other inference approaches, we determined the landscape of resource  
349 competition based on all >1,000 metabolomics-derived coarse-grained resources via  
350 regularized regression, i.e., LASSO, against yields in pairwise spent media (Methods).  
351 The resulting predictions for assembly compositions were substantially worse than even  
352 the base structure (mean error of 2.87 doublings per species, Fig. 3C), again highlighting  
353 that the incorporation of low-relevance niches can decrease model performance. We then  
354 tested a simple scheme in which the relative abundance of a species in a community was  
355 defined to be the fraction of metabolites that it consumed out of the union of metabolites  
356 consumed by all species in the community, and when multiple species shared the same  
357 set of metabolites, each species was assigned a fraction of those metabolites in  
358 proportion to its monoculture yield. Predictions based on this simple “metabolomics-only”  
359 scheme were also less accurate than for the base structure (mean error of 1.84 doublings

360 per species, Fig. 3C), further strengthening the utility of our framework that combines  
361 metabolomics and growth measurements for accurate predictions.

362  
363 To provide a comparison for the various CR models, we used the pairwise spent media  
364 experiments to parametrize a gLV model with pairwise interactions (Methods). The  
365 resulting gLV model failed to accurately predict assembly compositions, resulting in a  
366 mean error of 2.48 doublings per species, notably with a mean error of 3.98 doublings  
367 per species in assemblies of more than two species. One obvious cause of the  
368 disagreements was the prevalence of negative interactions, which led the gLV model to  
369 predict extinctions in cases that were not observed experimentally (Fig. S5). The relatively  
370 poor performance of other models further supports our conclusion that resource  
371 competition is a major driver in our system, and validates our method to parametrize a  
372 predictive CR model. Taken together, these results demonstrate that our framework,  
373 despite its potential limitations, led to the best parametrization of the landscape of  
374 resource competition that we have identified thus far.

375

### 376 ***The prominence of resource competition across environments***

377 Having developed an experimental and theoretical framework to probe resource  
378 competition, we next sought to examine the generality of the prominence of resource  
379 competition across media. To do so, we applied the framework developed in BHI to the  
380 same 15 species grown in another commonly used complex medium, modified Gifu  
381 Anaerobic Medium (mGAM). mGAM shares some but not all ingredients with BHI, and as  
382 a result, many species grew differently in the two media (Fig. 4A). In particular, the four  
383 species in the Bacteroidetes phylum (*Bacteroides thetaiotaomicron*, *Bacteroides fragilis*,  
384 *Bacteroides uniformis*, and *Parabacteroides distasonis*) exhibited substantially larger  
385 yields in mGAM. Despite these differences, spent media experiments showed that the  
386 distribution of normalized resource competition residues in mGAM was centered about  
387 zero (Fig. 4B), suggesting that resource competition is prominent in mGAM as it is in BHI.

388

389 Following the same logic as in BHI, we obtained LC/MS measurements of the spent media  
390 of each of the 15 isolates grown in mGAM. The resulting sizes of pairwise niche overlaps



391 were distinct but correlated across the two media (Fig. 4C), indicating that the landscape  
392 of resource competition depended partially on the environment. In addition, the mapping  
393 from metabolomes to growth yield was distinct across the two media. The number of  
394 depleted peaks in mGAM was correlated with growth in spent media ( $\rho = 0.54$ , Fig. 4D),  
395 although not as strongly as in BHI and not for the Bacteroidetes (Fig. 4D). This result  
396 suggests that the substantial increase in yield for the Bacteroidetes was due to an  
397 increase in the efficiency of biomass generation in mGAM, for example due to the  
398 presence of cofactors like hemin and vitamins (Halpern and Gruss, 2015).

399  
400 Despite potential differences in the efficiency of biomass generation for the Bacteroidetes,  
401 we reasoned that metabolomics data should still reflect the utilization structure of the  
402 shared resources. When parametrized using an optimized set of the largest  
403 metabolomics-derived niches, our CR model predicted assembly compositions in mGAM  
404 with a mean error of 1.72 doublings per species (Fig. 4E). Although these predictions  
405 were slightly less accurate than in BHI, they were still more accurate than other models  
406 that we considered. Predictions of assembly in BHI were less accurate when using the  
407 mis-matched mGAM-derived niches (with the resource levels and consumption rates re-  
408 inferred based on the mGAM-derived utilization structure) versus the matching BHI-  
409 derived niches (Fig. 4E), in agreement with the observation (Fig. 4C) that the landscape  
410 of resource competition can depend to a degree on the environment while also being  
411 partially fixed by the identity of the species. By contrast, the accuracy of predictions in  
412 mGAM were not significantly affected when using mis-matched niches (Fig. 4E). This  
413 finding suggests that our framework did not capture certain mGAM-specific interactions,  
414 consistent with the weaker correlation between metabolomes and yields in mGAM (Fig.  
415 4D). Nonetheless, our CR modeling framework predicted assembly compositions in  
416 mGAM with similar efficacy as in BHI. Taken together, these findings establish the  
417 prominence of resource competition across two distinct environments.

418

#### 419 ***A framework to disentangle interaction mechanisms***

420 While most pairs of species exhibited resource competition residues that were near-zero,  
421 ~25% of the residues in BHI deviated from zero (Fig. 1D), suggesting that some species

422 additionally interact via mechanisms other than resource competition. Deviations from Eq.  
423 1 can arise in many ways. For example, if the growth of species A affects that of B by an  
424 amount  $\Delta$  in addition to the assumptions of resource competition underlying Eq. 1 and  
425 this effect occurs similarly in spent medium and in co-culture, then the model would  
426 predict that  $r(A, B) := [A + B]^{\text{co}} - (A + B_A) = 0$  and  $r(B, A) := [A + B]^{\text{co}} - (B + B_B) = \Delta$   
427 (Fig. 5A). If the effect of A on B is specific to spent medium and does not occur in co-  
428 culture, the model would instead predict  $r(A, B) = -\Delta$  and  $r(B, A) = 0$  (Fig. 5A). For  
429 example, a species involved in the latter scenario is *Blautia producta* (*Bp*), whose spent  
430 medium almost completely inhibited the growth of all other species, i.e.,  $\Delta < 0$  (Fig. 5B).  
431 However, *Bp* grew more slowly than many other species (Fig. S2A), and thus these other  
432 species were able to grow in co-culture before the inhibitory effects of *Bp* occurred. The  
433 residues  $r(Bp, B)$  were therefore  $>0$  for most other species B (Fig. 5C), implying that there  
434 is a surplus of growth in co-culture relative to the inhibitory effects of *Bp*-spent medium.  
435 *Bp*-spent medium was highly acidic (pH  $\approx 5$ ), and the growth inhibition of other species  
436 was largely lifted in *Bp*-spent medium that was adjusted to neutral pH (Fig. 5B, Methods).  
437 Importantly, residues computed from yields in the neutralized spent medium were less  
438 positive and closer to zero (Fig. 5C), demonstrating that pH neutralization brought these  
439 pairs into close agreement with the baseline CR model and Eq. 1. Thus, the combination  
440 of resource competition and pH modification can describe the interspecies interactions of  
441 *Bp*.

442  
443 Within a model that accounts for only resource competition, growth inhibition can only be  
444 due to niche overlap. Therefore, the outsized inhibition by *Bp*-spent medium caused the  
445 linear regression used for parametrizing resource levels to infer high levels for niches  
446 shared between *Bp* and other species but a zero level for the *Bp*-specific niche (Fig. 3B).  
447 As a result, *Bp* was often predicted to go extinct (Fig. 3D), in disagreement with  
448 experimental data (mean error in *Bp* relative abundance of 4.07 doublings, largest out of  
449 all species). By contrast, when yields from pH-neutralized *Bp*-spent medium were used  
450 to parametrize the CR model, the *Bp*-specific niche was inferred to have a non-zero  
451 resource level, which dramatically improved model predictions (mean error in *Bp*  
452 abundance of 1.58 doublings, mean error across all species of 1.31 doublings per species,



453 Fig. 5D). These findings highlight that while mechanisms other than resource competition  
454 can potentially confound model parametrization, their effects can be disentangled and  
455 model parametrization improved in a quantitative and rational manner.

456  
457 Metabolic cross-feeding is another potential interaction mechanism that can occur in  
458 addition to competition for existing resources. Of the >17,000 metabolomic features in  
459 BHI that changed significantly in the spent media of any of the species, <2,500 (<15%)  
460 were produced (increased by >10-fold relative to fresh medium) by at least one species.  
461 Of these produced metabolites, <800 (<5%) were consumed by at least one other species  
462 (Fig. 2A). This analysis does not account for the ~700 peaks (<5%) that had an intensity  
463 <10<sup>2</sup> in fresh medium, which would make their consumption undetectable based on our  
464 definition. Nonetheless, the low percentages of produced and cross-feeding metabolites  
465 detected suggest that cross-feeding interactions are uncommon or exert small effects in  
466 our community. Substantial growth promotion by spent media was indeed rare. Only a  
467 single ordered pair of species out of 210 exhibited strong enough growth promotion such  
468 that growth in spent medium surpassed that in fresh medium: the spent medium of  
469 *Escherichia fergusonii* (*Efe*) substantially boosted the growth of *Bacteroides*  
470 *thetaiotaomicron* (*Bt*), resulting in a positive residue,  $r(Bt, Efe) > 0$  (Fig. 5E). *E. coli* (a  
471 close relative of *Efe*) can promote the growth of *Bt* due to the production of porphyrins,  
472 cofactors involved in iron metabolism that can stimulate the growth of members of the  
473 Bacteroidetes phylum (Halpern and Gruss, 2015). The yield of *Bt* grown in BHI  
474 supplemented with hemin, which contains porphyrins, increased to a similar extent as in  
475 *Efe*-spent medium (Fig. S6A), suggesting that the same cross-feeding mechanism occurs  
476 between *Efe* and *Bt* as between *E. coli* and *Bt*. Moreover, mGAM contains hemin, and *Bt*  
477 grew substantially better in mGAM than in BHI (Fig. 4A). Importantly, the residues  
478 between *Efe* and *Bt* were near-zero in mGAM, supporting the notion that interactions can  
479 depend on the environment.

480  
481 The beneficial effects of *Efe* on *Bt* persisted in a community context. In particular, *Bt* was  
482 not detected in the dropout assembly in which *Efe* was removed. To systematically  
483 quantify the effects of removing one species on all other species, we calculated z-scores

484  $z_{ij} := (x_{ij} - \mu_i)/\sigma_i$ , where  $x_{ij}$  is the  $\log_{10}$  relative abundance of species  $i$  in the dropout  
485 assembly in which species  $j$  was removed, and  $\mu_i$  and  $\sigma_i$  are the mean and standard  
486 deviation, respectively, of the  $\log_{10}$  relative abundance of species  $i$  across all dropout  
487 assemblies. Of all z-scores, only *Bt* and *Parabacteroides distasonis* (*Pd*) in the *Efe*-  
488 dropout had absolute value  $>3$  (Fig. S6B), indicating significant interactions. Although the  
489 yield of *Pd* did not increase in *Efe*-spent medium, its growth rate increased (Fig. S6C),  
490 corroborating the beneficial effects of *Efe* on *Pd* suggested by their significant z-score.  
491 The rarity of significant z-scores was consistent with the rarity of substantial growth  
492 promotion in spent media. More broadly, these results indicate that pairwise interactions  
493 other than resource competition can persist in larger communities.

494  
495 The parametrization of the CR model used above to predict assemblies in BHI did not  
496 incorporate the beneficial effects of *Efe* on *Bt*, which we hypothesized would cause poor  
497 predictions for the relative abundance of *Bt* when *Efe* was present. To test whether  
498 incorporating this beneficial interaction improves predictions, we modified the CR model  
499 by assuming that whenever *Efe* and *Bt* were both present, the predicted abundance of *Bt*  
500 increases by a constant amount equal to the difference in yields between *Bt* grown in *Efe*-  
501 spent medium and in fresh BHI. Remarkably, without any additional tuning of model  
502 parameters, prediction errors decreased for all assemblies containing both *Efe* and *Bt*  
503 (Fig. 5F). By contrast, when the same increase in abundance was applied to *Bt* when *Efe*  
504 was absent, prediction errors increased in some cases (Fig. 5F), implying that the  
505 enhanced growth of *Bt* was *Efe*-dependent. This example demonstrates that metabolic  
506 cross-feeding can be quantitatively and straightforwardly incorporated into the CR model.

507 **DISCUSSION**

508 In this study, we developed an experimental and theoretical framework to quantify the  
509 contributions of resource competition to community assembly. Although our framework  
510 cannot yet distinguish among all possible mechanisms, its quantification of resource  
511 competition led to accurate predictions of diverse assemblies. Similarly accurate  
512 predictions were obtained across two complex media, suggesting that the predominance  
513 of resource competition can be general across environments. Importantly, we identified  
514 and quantified several other interaction mechanisms to improve model predictions. These  
515 results provide a broadly applicable null model for community dynamics *in vitro* and *in*  
516 *vivo*.

517  
518 For example, our findings unify observations from several previous studies involving *in*  
519 *vitro* communities. For the same model community studied here (Aranda-Díaz *et al.*,  
520 2022), the effects of the addition of simple carbon sources on community dynamics could  
521 be quantitatively explained by the monoculture growth behaviors of isolates on those  
522 carbon sources, implying that competition for resources again drove community  
523 dynamics. When a separate synthetic community of >100 gut commensals colonizing  
524 germ-free mice was challenged by a human fecal sample via gavage, the relative  
525 abundances of species that persisted post-challenge were highly correlated with their pre-  
526 challenge values (Cheng *et al.*, 2021). This observation mirrors the tight distribution of z-  
527 scores in dropout assemblies and the compositional similarity of refilled communities,  
528 which together show that the removal or addition of a species typically did not affect  
529 community composition. This correspondence suggests that resource competition is  
530 predominant even in a community almost an order of magnitude more diverse than the  
531 one we have studied, and even in the context of host colonization.

532  
533 Our model should be able to predict the outcomes of *in vitro* scenarios such as nutrient  
534 perturbation, resistance to invasion, and community coalescence, which have direct  
535 implications for the *in vivo* analogs of dietary switches, pathogen infection, and fecal  
536 microbiota transplantation, respectively. Microbiota-accessible carbohydrates like inulin  
537 simultaneously affect community composition and decrease burden from *C. difficile*

538 infection in mouse models (Hryckowian et al., 2018). Decrease in *C. difficile* burden was  
539 linked with short chain fatty acids, metabolites associated with microbial metabolism of  
540 complex carbohydrates whose production by *Bacteroides* species has also been  
541 implicated in colonization resistance against *Salmonella* (Jacobson et al., 2018). The  
542 interplay among diet, community composition, and colonization resistance can be further  
543 clarified by measuring resource competition landscapes in media supplemented with  
544 complex carbohydrates. Model predictions from the resulting niche overlaps can untangle  
545 metabolite- or host-mediated effects from resource competition. Conversely, therapy by  
546 fecal microbiota transplantation seeks reliable colonization, the extent of which can also  
547 be predicted from *in vitro* growth measurements.

548  
549 A key conclusion that emerges from our study is that complexity can ultimately generate  
550 simplicity. In fact, the diversity of a community likely contributes to the predominance of  
551 resource competition by dampening the effects of outlier interactions on the rest of the  
552 community. For example, although *E. fergusonii* substantially promoted the growth of *B.*  
553 *thetaiotaomicron* (Fig. 5E), this interaction was the only case of growth promotion in spent  
554 media out of 210 ordered pairs and thus did not significantly affect other species in a  
555 community context. By contrast, the fly gut microbiota consists of only five species, hence  
556 the cross-feeding and pH interactions observed among those species can strongly affect  
557 the overall dynamics of the community (Aranda-Díaz *et al.*, 2020).

558  
559 The complexity of the environment also likely contributes to the predominance of resource  
560 competition. In particular, a complex medium may provide metabolites that would  
561 otherwise be cross-fed in minimal environments. Therefore, the environment may be as  
562 important as the identity of the community members in determining community dynamics  
563 (Hart *et al.*, 2019; Momeni et al., 2017). The complexity of the environment also likely  
564 contributes to the simple mapping between the number of metabolites and biomass yield  
565 (Fig. 2), presumably by averaging over biomass contributions from numerous sources.  
566 Consequently, a relatively simple resource competition landscape emerged (Fig. 3b). The  
567 media studied here were more complex than the community in the sense that they  
568 provided exclusive niches for each species (Fig. 3B), thereby enabling widespread

569 coexistence. Since the complexity of the environment relative to that of the community is  
570 an important determinant of the behavior of CR models (Cui *et al.*, 2021), it will be  
571 insightful to investigate the resource competition landscape in more sparse, ideally  
572 defined environments for which not all members have species-specific niches.

573  
574 The predominance of resource competition enabled our model to capture the majority of  
575 interactions, and hence, predict community assembly to reasonable accuracy despite  
576 initially not accounting for other interaction mechanisms. Some interactions likely only  
577 manifest in pairwise spent media and do not affect the dynamics of larger communities.  
578 For example, although pH modification by *Bp* confounded model parametrization (Fig.  
579 5B-D), it evidently played a relatively unimportant role in community dynamics, likely  
580 because most other species grew before *Bp* could modify the environment. Another  
581 phenomenon that could affect model parametrization was an apparent “self-inhibition”  
582 that occurred for certain species such that OD decreased after reaching its maximum  
583 value (e.g., *Clostridium symbiosum* in Fig. 5B). This phenomenon was rare in spent media  
584 and co-cultures, suggesting that it is relatively unimportant in community dynamics. In  
585 any case, the effects of self-inhibition on model parametrization, community dynamics, or  
586 both were evidently small relative to the effects of resource competition. Other  
587 interactions, such as the *Efe-Bt* interaction, persisted in larger communities. In these  
588 scenarios, we demonstrated that our framework could disentangle the mechanisms  
589 involved and incorporate the additional mechanisms into the model to improve  
590 predictions. We envision that this strategy can be executed iteratively to quantify other  
591 factors that contribute to community dynamics, such as interspecies differences in the  
592 efficiency of biomass generation and interspecies killing. In this manner, our framework  
593 provides a generalizable tool to construct mechanistic models of community dynamics for  
594 diverse communities in complex environments, which will facilitate the rational  
595 engineering of microbial communities.

## 596 **METHODS**

### 597 **Bacterial culturing**

598 Isolates were obtained via plating of fecal samples from humanized mice and frozen as  
599 glycerol stocks, as previously described (Aranda-Díaz *et al.*, 2022). Frozen stocks were  
600 streaked onto BHI-blood agar plates (5% defibrinated horse blood in 1.5% w/v agar).  
601 Resulting colonies were inoculated into 3 ml Brain Heart Infusion (BHI) (BD #2237500) or  
602 modified Gifu Anaerobic Medium (mGAM) (HyServe #05433) in test tubes. All culturing  
603 and measurements were performed at 37 °C without shaking in an anaerobic chamber  
604 (Coy). To minimize potential physiological changes from freeze-thaw cycles and changes  
605 in growth medium, cultures were diluted 1:200 every 48 h for 3 passages before growth  
606 or metabolomics measurements. After the first passage, subsequent passages were  
607 performed in 96-well polystyrene plates (Greiner Bio-One) filled with 200 µl of growth  
608 medium.

609

### 610 **Bacterial growth measurements**

611 Biomass yield over time was obtained via optical density at 600 nm (OD) as measured by  
612 an Epoch 2 plate reader (Biotek). All measurements were performed in clear, flat-  
613 bottomed 96-well plates (Greiner Bio-One #655161). Each well was filled with 200 µl of  
614 growth medium and inoculated with 1 µl of stationary phase culture immediately before  
615 measurement. Plates were sealed with transparent seals (Excel Scientific #STR-SEAL-  
616 PLT), with small (~0.5 mm) holes cut above each well to allow gas exchange.  
617 Measurements were taken with continuous shaking at 37 °C.

618

### 619 **Growth in spent media**

620 Spent media were obtained by centrifuging saturated cultures at 4,000 × *g* for 5 min and  
621 filtering the supernatant with 0.22 µm polyethersulfone filters (Millex-GP #SLGP033RS)  
622 or 96-well 0.22 µm filter plates (Pall #8019). To investigate pH-mediated effects, *Bp*-spent  
623 medium was adjusted to a pH of 7.35 with NaOH, and filtered again to sterilize.

624

### 625 **Liquid chromatography-mass spectrometry (LC-MS) metabolomics**

626 Spent media were collected as described above, and immediately stored at -80 °C.  
627 Samples were thawed only once immediately before LC-MS/MS analysis. Samples were  
628 analyzed by two chromatography methods, reversed phase (C18) and hydrophilic  
629 interaction chromatography (HILIC). Protocol details and parameters are described in the  
630 Supplemental Information. Briefly, metabolites were extracted using extraction mixtures  
631 containing stable isotope labeled internal standards. Samples for C18 analysis were dried  
632 at room temperature using a Labconco CentriVap, and reconstituted in 20% acetonitrile  
633 prior to analysis. 2 µl of prepared samples were injected onto a Waters Acquity UPLC  
634 BEH Amide column with an additional Waters Acquity VanGuard BEH Amide pre-column  
635 (HILIC) or Agilent SB-C18 column with a Phenomenex KrudKatcher Ultra filter frit  
636 attached to the column inlet (C18). The columns were coupled to a Thermo Vanquish  
637 UPLC machine. Chromatographic separation parameters (Showalter et al., 2018) and  
638 mass spectral parameters (Han *et al.*, 2021) were described previously, with minor  
639 modifications (Supplemental Information). Spectra were collected using a Thermo Q  
640 Exactive HF Hybrid Quadrupole-Orbitrap mass spectrometer in both positive and  
641 negative mode ionization (separate injections, sequentially). Full MS-ddMS2 data were  
642 collected. Data were processed using MS-DIAL v. 4.60 (Tsugawa et al., 2015; Tsugawa  
643 et al., 2020). Alignment retention time and mass tolerance were set to 0.05 min and 0.015  
644 Da, respectively. Aligned peaks were retained for further analyses only if they were  
645 present in at least two of three replicates and were >5-fold higher than the water blank  
646 average in at least one sample.

647

## 648 **Assembly experiments**

649 Communities were assembled from stationary phase cultures of isolates mixed at equal  
650 volume, and 1 µl of the mixture was inoculated into 200 µl of growth medium. Plates were  
651 sealed and incubated at 37 °C without shaking. The assemblies were diluted 1:200 into  
652 fresh medium every 48 h for 5 passages to reach an ecological steady state in which  
653 further passages have virtually identical dynamics (Aranda-Díaz *et al.*, 2022). The 15  
654 single species “dropout” assemblies with 14 of the 15 members were passaged for 3  
655 passages. In “refill” experiments, the inoculum for each dropout was mixed 1:1, 1:10,  
656 1:100, 1:1,000, or 1:10,000 with the monoculture of the species that was left out, and



657 passaged 3 times. The final passage for assembly experiments was grown in a plate  
658 reader for OD measurements, after which the plate was stored at -80 °C until DNA  
659 extraction for 16S rRNA gene sequencing was performed.

660

### 661 **16S rRNA gene sequencing and analyses**

662 Amplicon sequencing data were obtained and processed as previously described  
663 (Aranda-Díaz *et al.*, 2022). Relative abundances were determined to a minimum  
664 threshold of  $10^{-4}$ , reflecting the typical depth of sequencing. The relative abundances of  
665 undetected species were set to  $10^{-4}$  for visualization and for calculating the error between  
666 model predictions and experimental data. The three *Enterococcus* species were  
667 indistinguishable by the amplicon protocol used here. When more than one was present,  
668 their relative abundances were summed and visualized as *Eh* if *Eh* was present, else as  
669 *Efs*.

670

### 671 **Analyses of growth curves**

672 Each growth curve in monoculture was fit to Eq. 2 with one resource to extract the final  
673 yield  $K$ , growth rate  $\lambda$ , and lag time  $\tau$  associated with that species. The culture yield over  
674 time  $X(t)$  in Eq. 2 with one resource reduces to  $X(t) = K[1 + (K/X_0 - 1) \exp(-\lambda(t -$   
675  $\tau))]^{-1}$ , where  $X_0 := X(t = 0)$  is the initial value, and the final yield is taken at 48 h,  $K :=$   
676  $X(t = 48 \text{ h})$ . The growth rate and lag time were determined by a grid search to find the  
677 values that minimize the mean squared error between predicted and experimentally  
678 measured  $X(t)$ .

679

### 680 **Analyses of metabolomics data**

681 Metabolomic features that passed pre-processing were defined as depleted or produced  
682 if they decreased by >100-fold or increased by >10-fold, respectively, compared to fresh  
683 medium, and if the difference was significant ( $p < 0.05$ ) by a two-sample *t*-test. Coarse-  
684 grained resources were obtained by grouping metabolomic features that shared the same  
685 set of consuming species.

686

### 687 **Simulations of coarse-grained consumer-resource (CR) model**



688 To mimic our experimental protocol, Eq. 2 was simulated under a serial dilution scheme  
689 in which each dilution cycle continued until stationary phase when all resources were  
690 depleted ( $dY_\mu/dt = 0$  for all  $\mu$ ), after which a new cycle was initiated by replenishing the  
691 resources to their initial levels  $Y_\mu^0$  and diluting all species abundances by a factor  $D$ , which  
692 was set at 200 both experimentally and in simulations throughout this work. In  
693 simulations, the first cycle was initialized with equal abundances of each species, and  
694 dilutions were repeated until an ecological steady state was reached in which further  
695 cycles produced identical dynamics. At ecological steady state, species abundances in  
696 stationary phase are linear combinations of the resource levels since all resources have  
697 been converted to biomass. To compare against experimental data, relative abundances  
698 less than  $10^{-4}$  were considered undetectable and removed in further calculations.

699

#### 700 **Residues in randomly generated coarse-grained CR models**

701 To determine the typical distribution of resource competition residues in coarse-grained  
702 CR models, we randomly selected 100 coarse-grained resources out of the  $2^{15} - 1$   
703 possible groupings of 15 species. Each resource was assigned a random level from a  
704 uniform distribution from 0 to 1. The yields of monocultures and pairwise spent media  
705 experiments can then be calculated directly by summing the levels of resources  
706 consumed. Simulated yields were then modified with a 5% noise, the typical standard  
707 deviation of the mean in our measurements of yield, before calculating the resource  
708 competition residues.

709

#### 710 **Parametrization of coarse-grained CR models**

711 The parameters of the CR model in Eq. 2 are the initial resource levels  $Y_\mu^0$  and resource  
712 consumption rates  $R_{i\mu}$ . The resource levels were inferred via linear regression as  
713 described in the text. Each experiment in monoculture and pairwise spent media  
714 represented one equation in the regression. In each equation, the unknowns are the  
715 resource levels that sum to the known final yield in that experiment. The consumption  
716 rates were inferred as described in the text.

717

718 Regularized linear regression, i.e., LASSO, was used to parametrize resource utilization  
719 structures with more unknowns than experiments. The regression problem was set up as  
720 in the linear regression case, with the addition that a regularization parameter determined  
721 the predicted number of coarse-grained resources with non-zero resource levels. The  
722 regularization parameter was chosen so that LASSO resulted in 40 non-zero resources.

723

#### 724 **Parametrization of a generalized Lotka-Volterra (gLV) model**

725 A gLV model was considered in which  $dX_i/dt = X_i(r_i + \sum_j A_{ij}X_j)$ , where  $X_i$  denotes the  
726 abundance of species  $i$ ,  $r_i$  its growth rate, and  $A_{ij}$  the interaction coefficient of species  $j$   
727 on species  $i$ . Model parameters  $r_i$  and  $A_{ij}$  were parametrized from growth  
728 measurements in isolate and pairwise spent media as follows. In the absence of other  
729 species, species  $i$  will reach a steady state abundance  $\bar{X}_i = -r_i/A_{ii}$ . The self-interaction  
730 terms  $A_{ii}$  are free parameters that we set to -1 for simplicity. Hence, the growth rates are  
731 simply equal to the experimentally determined isolate yields, i.e.,  $r_i = \bar{X}_i$ . Then for the  
732 case of species  $j$  growing in the spent medium of species  $i$ , we assumed that the effect  
733 of the spent medium was implemented within the model by a constant presence of  
734 species  $i$  at its steady state value  $X_i = \bar{X}_i$ . Thus, at steady state, the abundance of  
735 species  $j$  grown in the spent medium of species  $i$  is  $\bar{X}_{ji} = r_j + A_{ji}\bar{X}_i$ . The interaction  
736 coefficient can therefore be expressed as a combination of experimentally determined  
737 yields in spent media, i.e.,  $A_{ji} = (\bar{X}_{ji} - \bar{X}_j)/\bar{X}_i$ .

738 **ACKNOWLEDGMENTS**

739 We thank members of the Huang lab for helpful discussions, and Jonas Cremer, Ben  
740 Good, Karna Gowda, Mikhail Tikhonov, Ned Wingreen, and Katherine Xue for a critical  
741 reading of the manuscript. We thank Biohub team member Wasim Sandhu for metabolite  
742 extraction and LC-MS/MS data acquisition. This work was funded by the Stanford School  
743 of Medicine Dean's Postdoctoral Fellowship (to P.H.), NIH Postdoctoral Fellowship F32  
744 GM143859 (to P.H.), NSF Graduate Research Fellowship (to T.H.N.), NSF Awards EF-  
745 2125383 and IOS-2032985 (to K.C.H.), and NIH Awards R01 AI147023 and RM1  
746 GM135102 (to K.C.H.). K.C.H. is a Chan Zuckerberg Biohub Investigator.

747 **FIGURES**

748

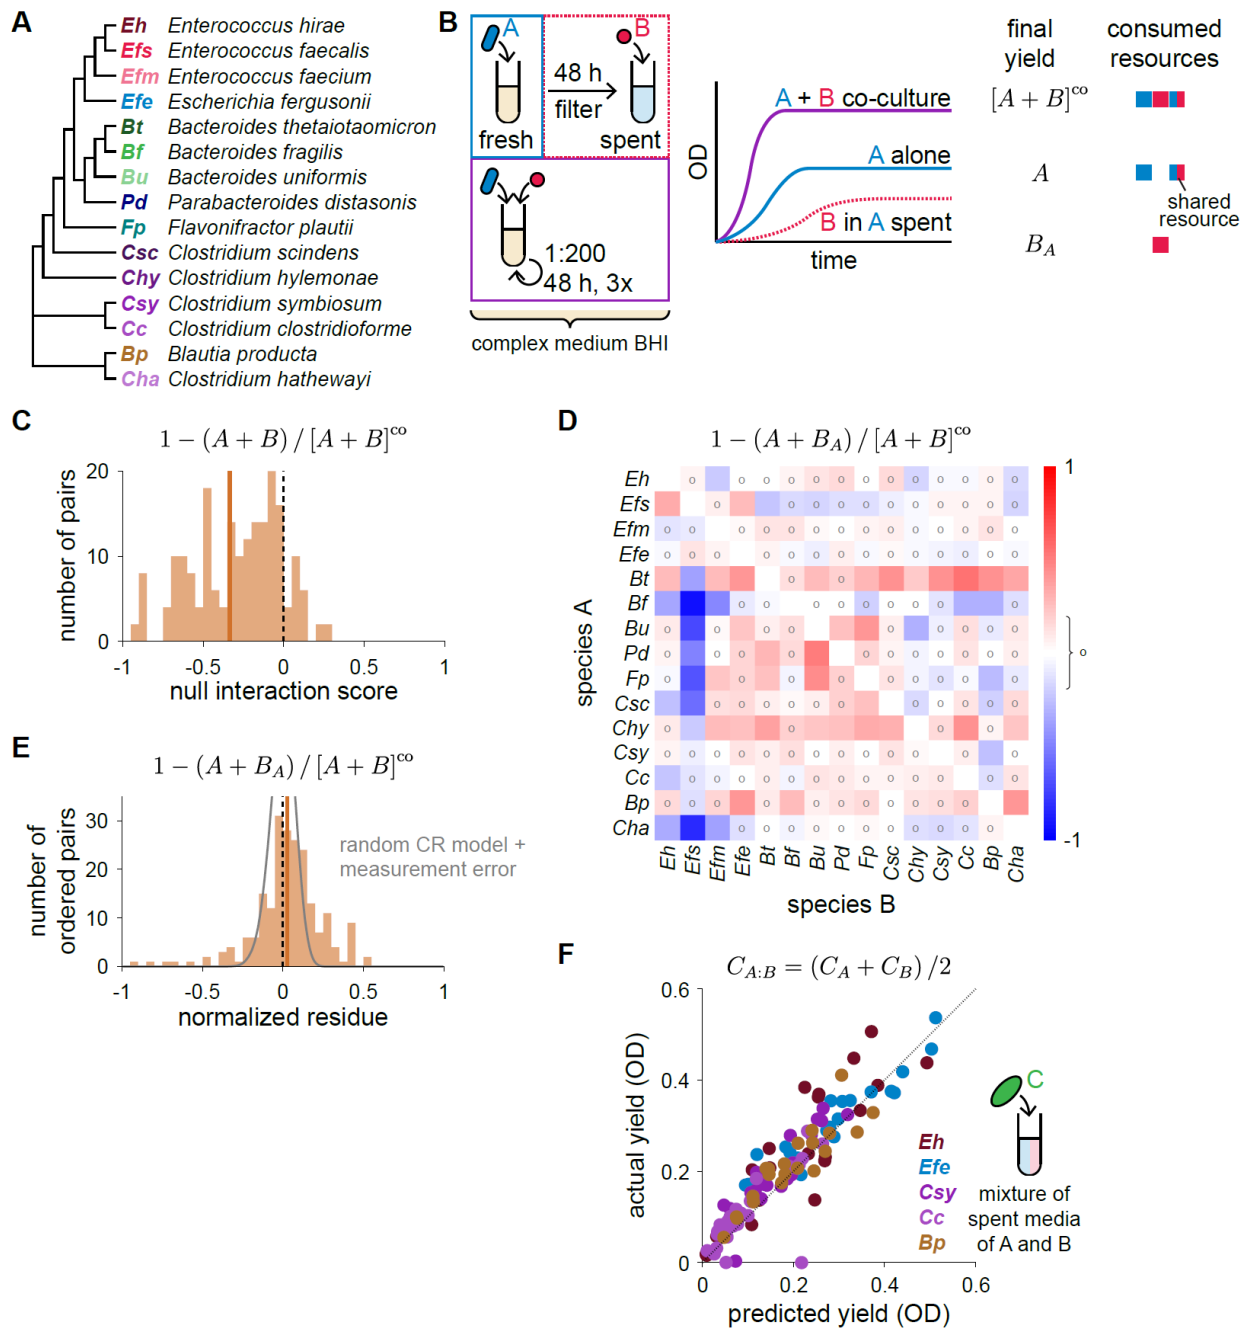

749

750 **Figure 1: Coarse-grained resource competition describes most pairwise**  
 751 **interactions.**

752 A) Phylogenetic tree of the 15 gut commensals studied here (Aranda-Díaz *et al.*,  
 753 2022). The tree was constructed from the amplicon region of the 16S rRNA gene  
 754 (Methods).

- 755 B) Schematic of growth experiments in pairwise spent media and the predictions of  
756 the coarse-grained CR model. Growth curves of optical density (OD) over time  
757 were obtained for each species grown in isolation, in co-culture with every other  
758 species, and in the spent media of every other species, all in the complex medium  
759 Brain Heart Infusion (BHI). Experiments were replicated 2-4 times. In the coarse-  
760 grained CR model, the final yield is determined by the levels of coarse-grained  
761 resource groups, resulting in Eq. 1.
- 762 C) The null interaction score, the difference between the yields of the co-culture and  
763 the sum of the isolate yields, was negative for most species pairs. Solid vertical  
764 line denotes the mean.
- 765 D) Most components of the matrix of normalized resource competition residues are  
766 close to zero. Circles denote residues with absolute value  $<0.2$ . The null interaction  
767 scores and resource competition residues were calculated from mean values  
768 across 2-4 replicates.
- 769 E) The distribution of normalized residues was centered about zero. Simulated results  
770 from randomly generated coarse-grained CR models with experimentally  
771 motivated measurement error are shown in gray (Methods).
- 772 F) Yield in 1:1 mixtures of spent media is predicted by the average of the yield in each  
773 spent media individually. Colors denote the species grown, which was chosen to  
774 obtain a wide range of yields. Each of the species shown was grown in every  
775 pairwise mixture of the spent media from *Eh*, *Efe*, *Csy*, *Bt*, *Bp*, *Csc*, *Efs* or fresh  
776 BHI.  
777

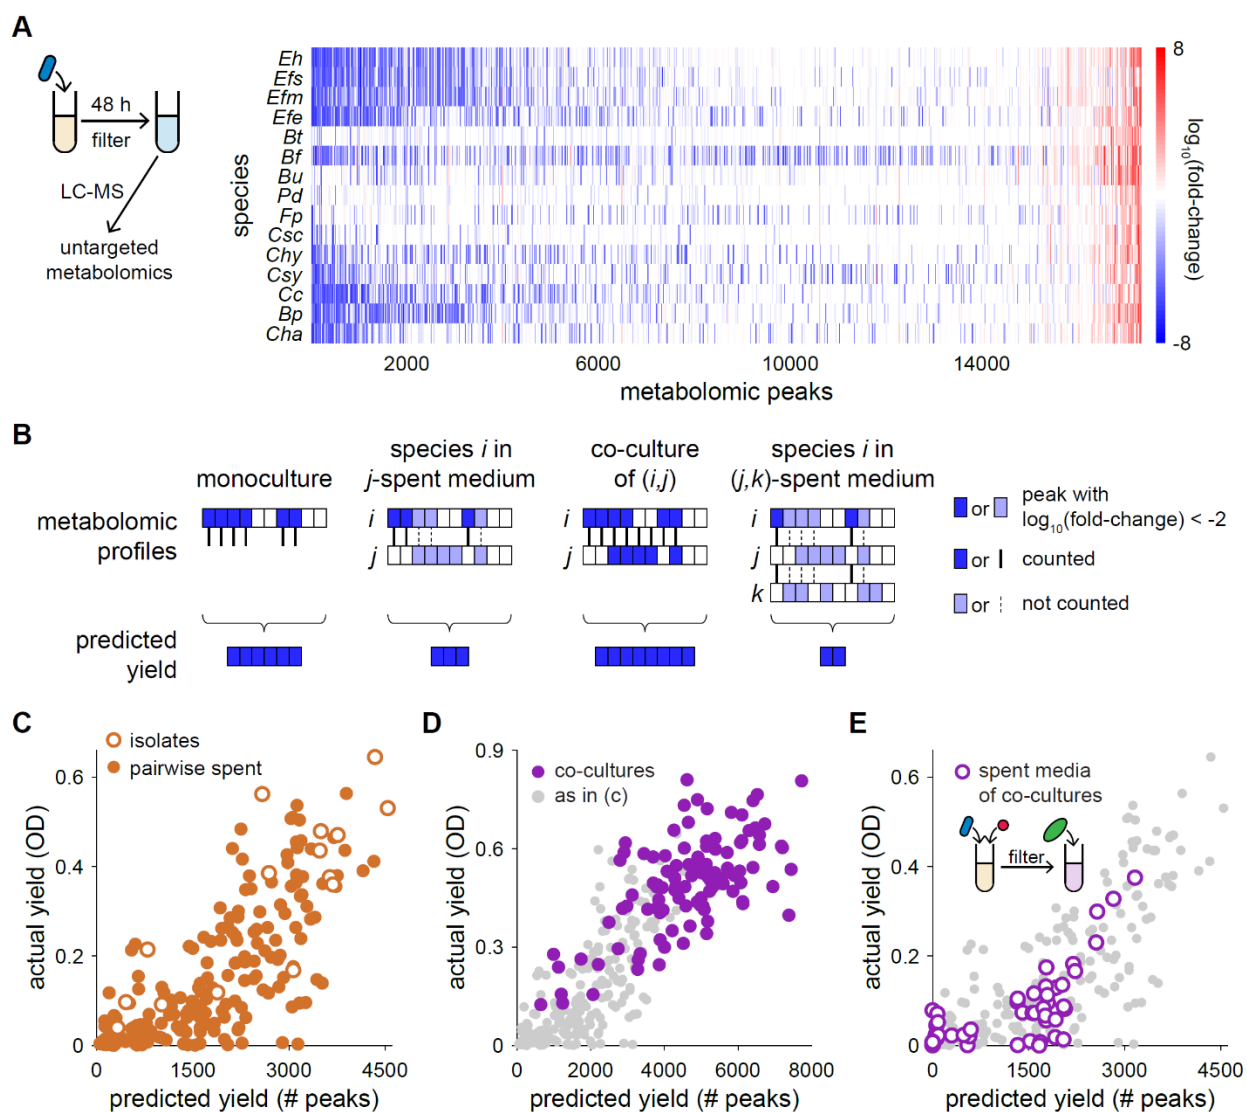

778

779 **Figure 2: Metabolomic profiles predict growth in monoculture, co-culture, and**  
780 **spent media.**

781 A) Schematic of metabolomics experiments and the resulting profile of fold-change in  
782 LC-MS ionization intensity relative to fresh medium BHI for each species. Shown  
783 are all metabolomic features, including unannotated ones, that changed  
784 significantly in the spent medium of any of the species (Methods). For each  
785 metabolomic feature (“peak”),  $\log_{10}$  of the average fold-change across 3 replicates  
786 is shown. One metabolite can generate multiple metabolomic features.

787 B) Schematic of rule used to predict yield from metabolomics profiles. The predicted  
788 yield of a species in monoculture is defined as the number of metabolomic peaks  
789 (rectangles) that were depleted in the spent medium of that species (blue

790 rectangles). The predicted yield of species  $i$  in the spent medium of  $j$  is defined as  
791 the number of peaks depleted by  $i$  but not  $j$ , and analogously for co-cultures of  $i$   
792 and  $j$ , as well as  $i$  growing in the co-culture of  $j$  and  $k$ .

793 C) Metabolomic profiles can generally predict yield measurements. The actual and  
794 predicted yields in monocultures and pairwise spent media experiments were  
795 highly correlated (Pearson's correlation coefficient  $\rho = 0.83$ ,  $0.76$ , and  $0.78$  for  
796 experiments involving isolates, pairwise spent media, and together, respectively).  
797 Shown are mean yields across 2-4 replicates.

798 D) Metabolomic profiles successfully predict co-culture yields ( $\rho = 0.65$ ). All co-culture  
799 experiments are shown. Shown are the mean yields across 2-4 replicates. Isolate  
800 and pairwise data, as in (b), are shown in gray in (c,d) as a visual guide.

801 E) Metabolomic profiles successfully predict isolate yields when grown in the spent  
802 media of co-cultures ( $\rho = 0.74$ ). Two species ( $Eh$  and  $Efe$ ), chosen to obtain a wide  
803 range of yields, were grown in the spent media of all pairwise co-cultures of  $Eh$ ,  
804  $Efe$ ,  $Csy$ ,  $Bt$ ,  $Cc$ ,  $Bp$ ,  $Csc$ , and  $Efs$ .

805

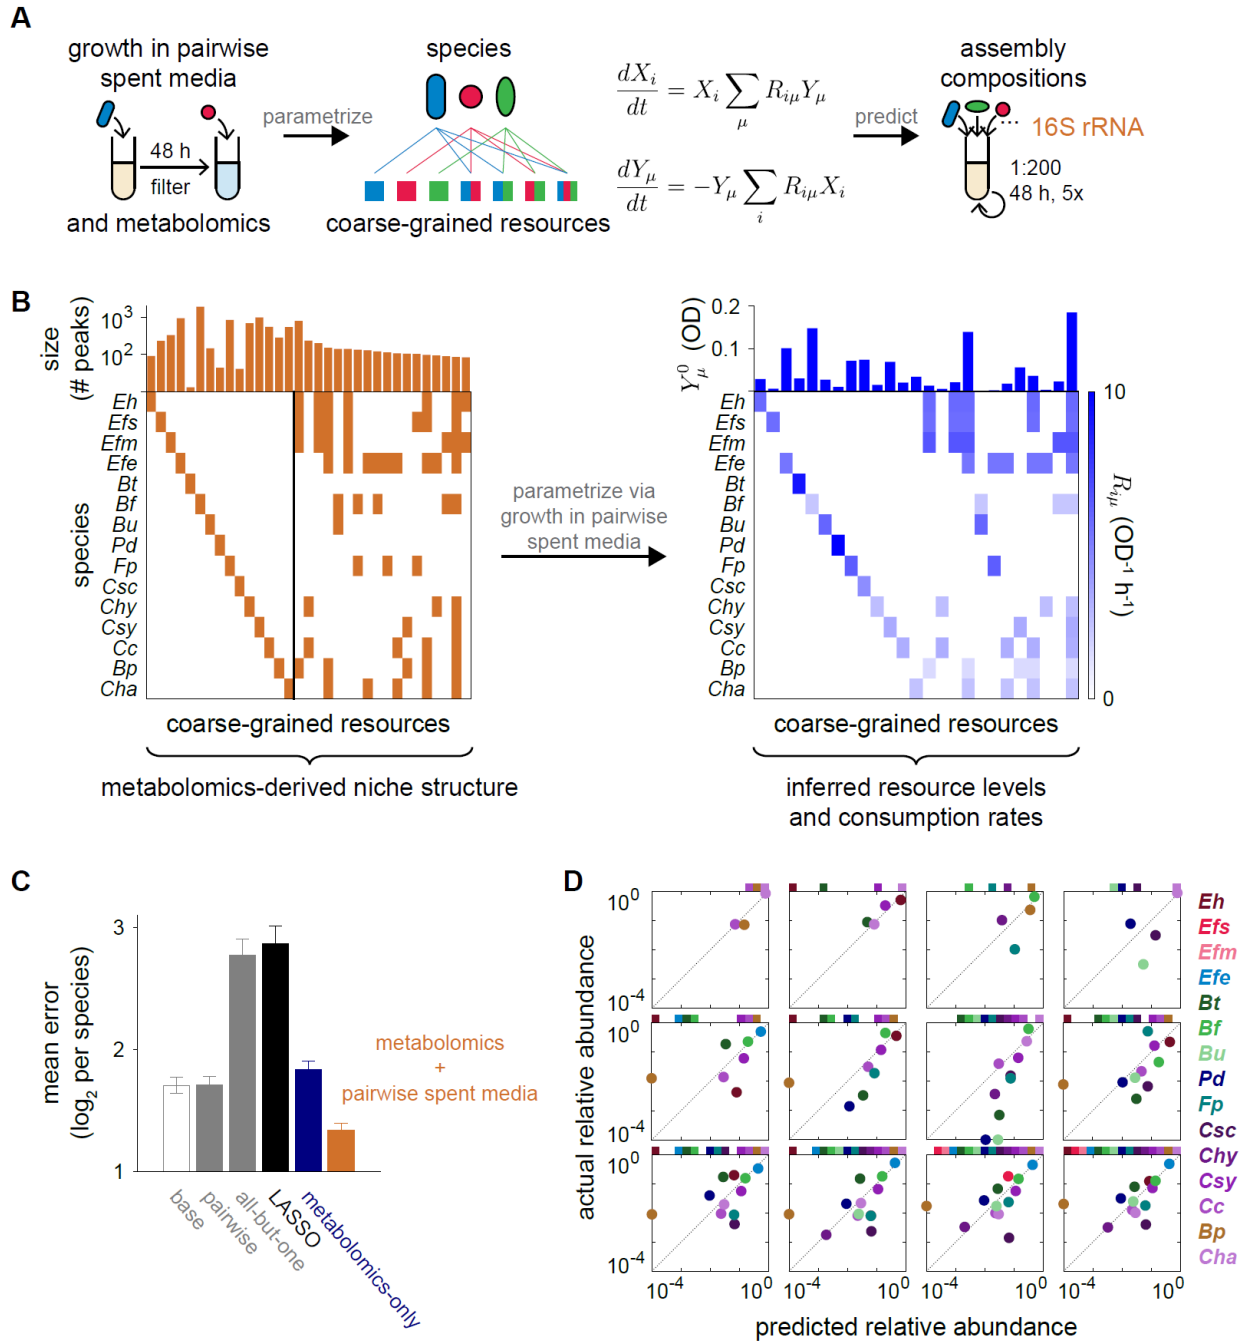

806

807 **Figure 3: A consumer-resource model parametrized by metabolomics data and**  
 808 **growth in spent media predicts community assembly.**

809 A) Schematic for predicting community assembly using a coarse-grained CR model.  
 810 Metabolites are coarse-grained together if they are consumed by the same set of  
 811 species (middle). The landscape of resource sharing among species was inferred  
 812 from metabolomics data, and resource levels and consumption rates were inferred



813 from growth curves in pairwise spent media (left). The parametrized CR model (Eq.  
814 2, middle; implementation of lag times not shown for brevity) was then used to  
815 predict the composition of 185 assemblies of 2 to 15 species and compared  
816 against experimentally determined relative abundances from 16S rRNA gene  
817 sequencing (right) (Methods).

818 B) The resource sharing structure obtained by coarse-graining metabolomics data in  
819 BHI (left). The 15 species-specific groups (left of vertical line) and 18 of the  
820 remaining resource groups with the greatest number of constituent metabolites  
821 (right of vertical line) are shown. The metabolomics-derived niche structure was  
822 used in combination with growth measurements in pairwise spent media to infer  
823 the resource levels  $Y_{\mu}^0$  in fresh medium and resource consumption rates  $R_{i\mu}$  (right).

824 C) A CR model parametrized by combining metabolomics and growth measurements  
825 in pairwise spent media achieved the best mean error out of all models considered.  
826 The mean error was determined by averaging across all 185 assemblies the  
827 magnitude of  $\log_2$  fold-change between actual and predicted relative abundances,  
828 normalized by the number of species in the assembly. The performance of the  
829 metabolomics-derived landscape from (b) is shown in orange. The results of three  
830 hypothetical structures are shown in gray for comparison: a “base” structure with  
831 only species-specific niches, one including this base structure and every coarse-  
832 grained niche shared between species pairs, and another one including the base  
833 structure and every coarse-grained niche shared by all but one species. Shown in  
834 black and blue are the results of inferences via LASSO and the “metabolomics-  
835 only” scheme, respectively, as described in the text and Methods.

836 D) Examples of predictions. Each panel represents one assembly, and colored  
837 squares, placed at the same location in each panel for each species, indicate  
838 species that were present in the inoculum of that assembly. The relative  
839 abundances of undetected species are set to  $10^{-4}$  for visualization and for  
840 calculating prediction errors. Shown are mean values across 2-3 replicates.

841

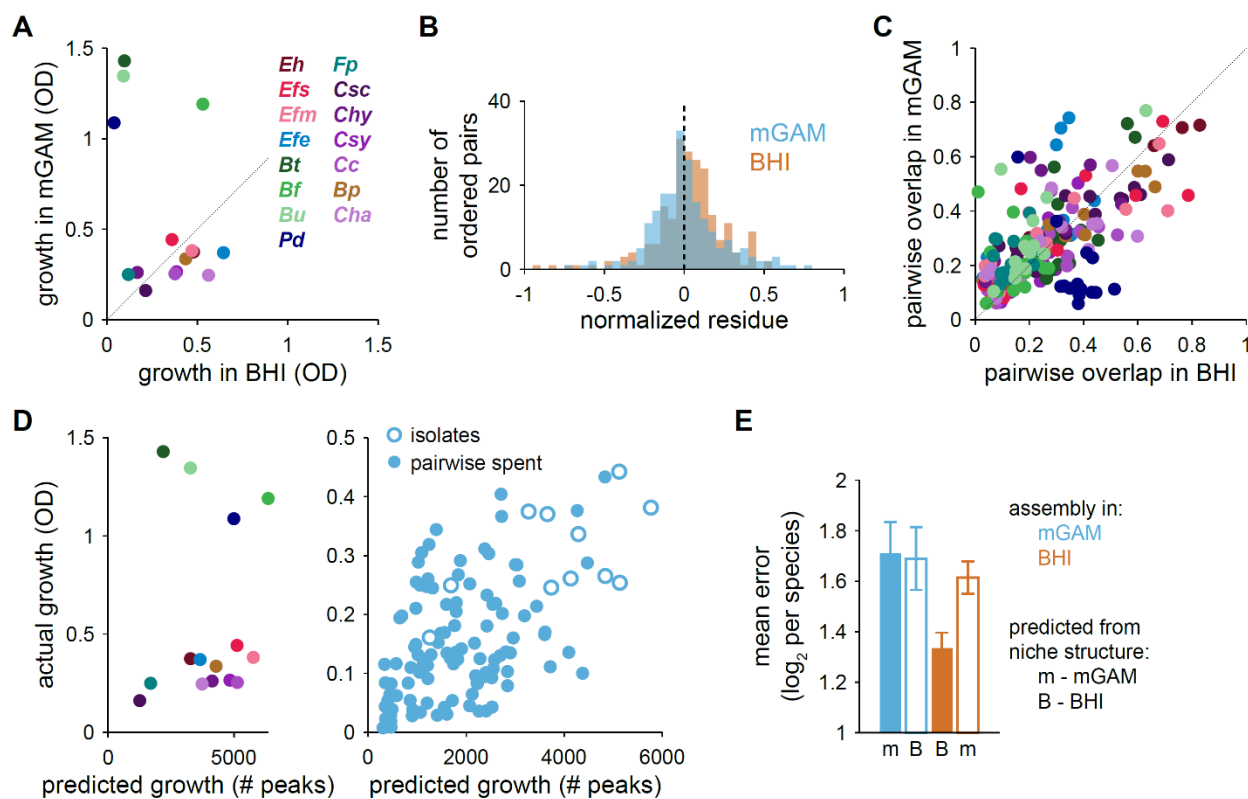

842

843 **Figure 4: Resource competition drives community assembly across distinct growth**  
 844 **environments.**

845 A) Monoculture yields in mGAM differed from those in BHI, particularly for the  
 846 Bacteroidetes, which exhibited substantially larger yields in mGAM. Mean values  
 847 across 2-4 replicates are shown.

848 B) The distribution of resource competition residues in mGAM was centered about  
 849 zero as in BHI.

850 C) Pairwise overlaps in metabolomic profiles in mGAM and BHI were moderately  
 851 correlated ( $\rho = 0.66$ ). The pairwise overlap between the ordered species pair ( $i, j$ )  
 852 is defined as the number of metabolomic peaks depleted by both species divided  
 853 by the number depleted by species  $i$ . Pairwise overlaps are colored according to  
 854 species  $i$ .

855 D) The experimentally determined yield in monoculture (left) or pairwise spent media  
 856 (right) was correlated with the number of depleted peaks for experiments not  
 857 involving the four Bacteroidetes species ( $\rho = 0.54$ ), which are not shown on the  
 858 right.

859 E) Mean error of model predictions in mGAM (blue) and BHI (orange), as inferred  
860 using resource utilization structures derived from metabolomics data in mGAM  
861 (“m”) or BHI (“B”), with the resource levels and consumption rates re-inferred.  
862 Mean errors resulting from utilization structures derived from metabolomics data  
863 in the matching environment are shown as solid bars, while mean errors from mis-  
864 matched structures are shown as empty bars.  
865

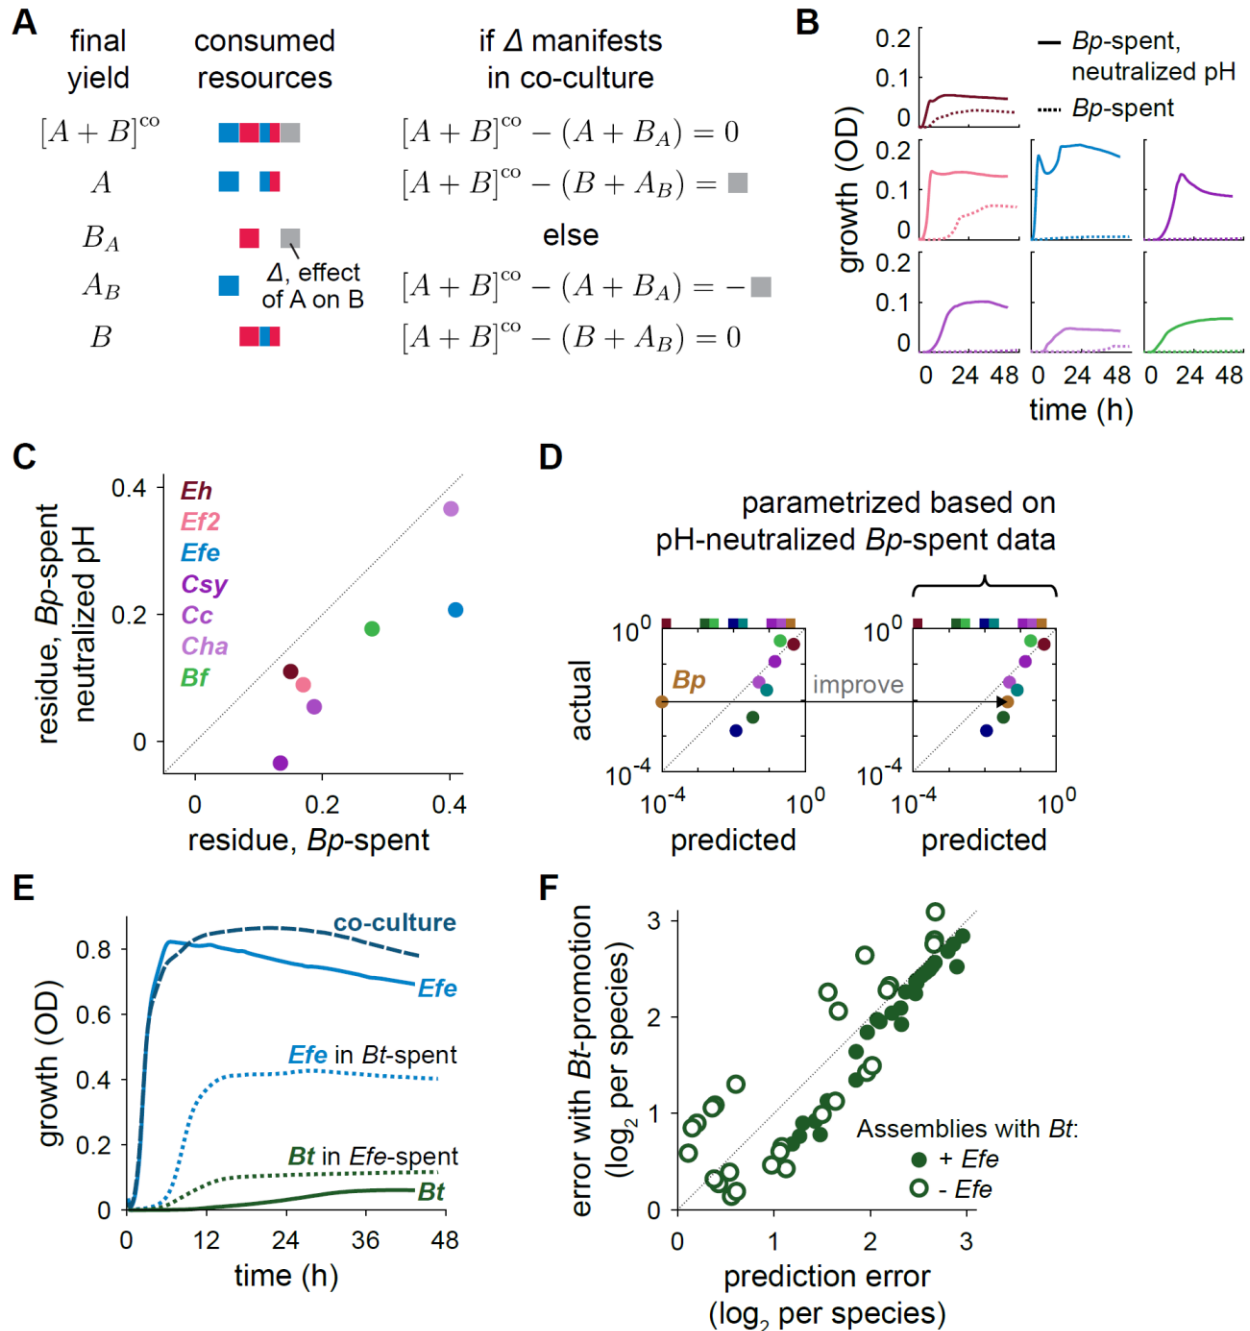

866

867 **Figure 5: Strategies for disentangling pH and metabolic cross-feeding interactions**  
 868 **from resource competition.**

869 A) Schematic for interpreting resource competition residues. Gray square denotes an  
 870 additional contribution to growth from a mechanism other than resource  
 871 competition.

- 872 B) pH-mediated interactions involving *Blautia producta* (*Bp*). Shown are growth  
873 curves in *Bp*-spent medium and *Bp*-spent medium with neutralized pH for species  
874 that grow more quickly than *Bp* in monoculture.
- 875 C) Resource competition residues became less positive and closer to zero after  
876 neutralizing the pH of *Bp*-spent medium (Methods).
- 877 D) Model predictions improved after parametrization based on growth in pH-  
878 neutralized *Bp*-spent medium. Shown are predictions for an example assembly  
879 from Fig. 3D based on models parametrized without (left) and with (right) data from  
880 pH-neutralized *Bp*-spent medium. Arrow highlights improved model prediction for  
881 *Bp* coexistence.
- 882 E) *E. fergusonii* interacts with *B. thetaiotaomicron* through cross-feeding. Shown are  
883 OD over time in pairwise spent media for *Efe* and *Bt*. *Bt* grew more quickly and to  
884 a higher yield in *Efe*-spent medium, the only case of growth promotion in spent  
885 medium out of all 210 pairs.
- 886 F) Errors of model predictions after incorporating cross-feeding into the model.  
887 Prediction errors for each assembly containing *Bt* are shown for the parametrized  
888 CR model (Fig. 3B) and the same model with an additional boost in *Bt* growth. A  
889 fixed boost to *Bt* abundance equal to the difference in yields between *Bt* in *Efe*-  
890 spent and *Bt* in monoculture was applied whenever *Bt* was present. Assemblies  
891 that also contain *Efe* are shown as filled circles, and those without *Efe* are shown  
892 as empty circles. Assemblies with *Efe* were always better predicted when *Bt*-  
893 promotion was included, whereas assemblies without *Efe* fared better or worse in  
894 an apparently random manner.
- 895

896 **SUPPLEMENTAL FIGURES**

897

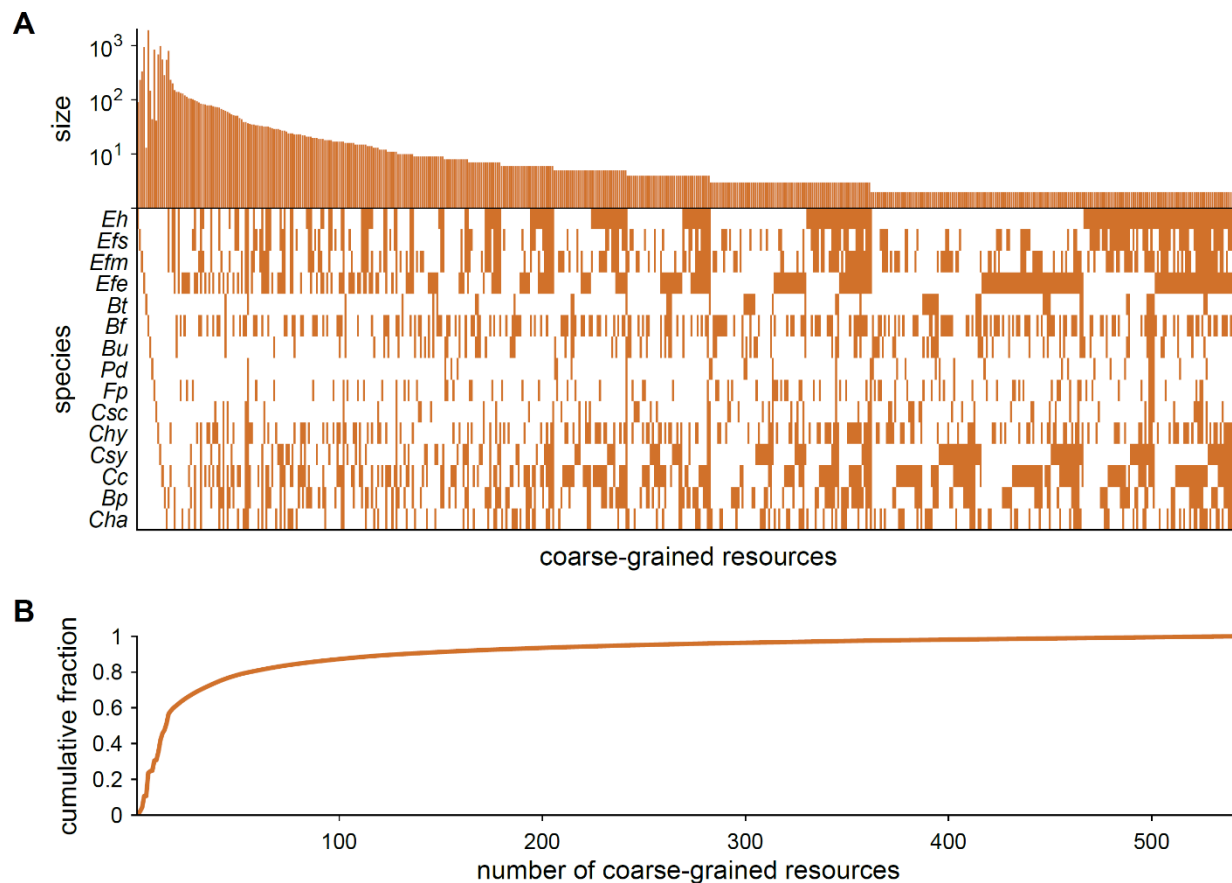

898

899 **Figure S1: Metabolomics-derived coarse-grained resources.**

900 A) Size and structure of metabolomics-derived coarse-grained resources. A  
901 metabolomic peak was considered depleted if it decreased by >100-fold compared  
902 to fresh media. Metabolites that share the same set of consuming species were  
903 grouped together and are shown as one column in the matrix. The number of  
904 metabolomic peaks in each group is shown above each column. Only niches with  
905 more than one constituent metabolite are shown.

906 B) The cumulative fraction of the number of metabolomic peaks as a function of the  
907 number of groups.

908

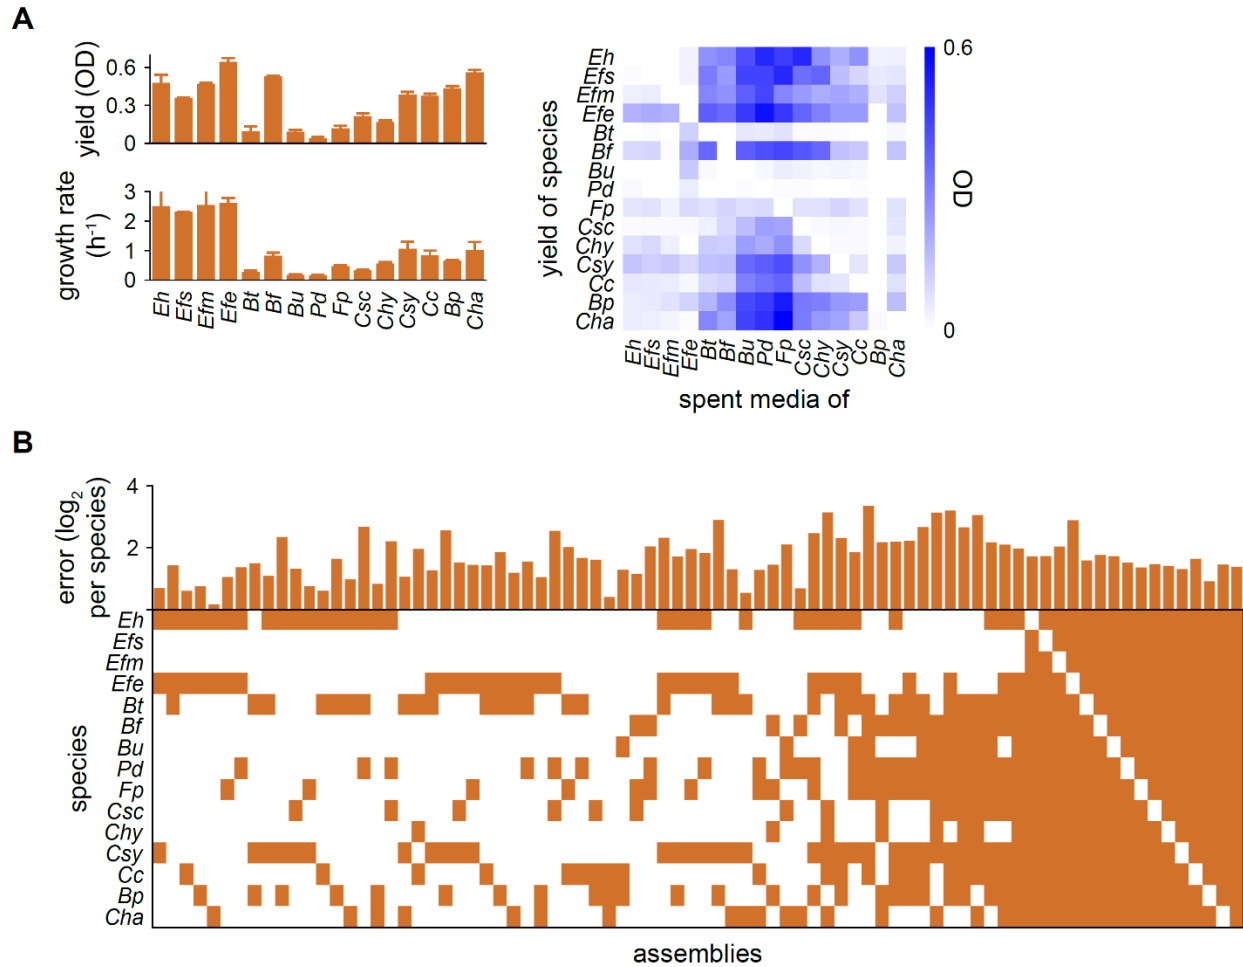

909

910 **Figure S2: CR model successfully predicted assembly compositions.**

911 A) Model input: growth rates and yields in monocultures (left) and yields in pairwise  
912 spent media (right). The mean value across 2-4 replicates is shown. Error bars  
913 denote the standard error of the mean. Parametrization outputs are the inferred  
914 resource levels and consumption rates, and are shown in Fig. 3B.

915 B) Prediction error for each assembly. Only assemblies with more than 2 species are  
916 shown. All pairwise co-cultures were also assembled and tested. For each  
917 assembly, the error was calculated between model predictions and the mean  
918 relative abundance observed across 3 experimental replicates.

919

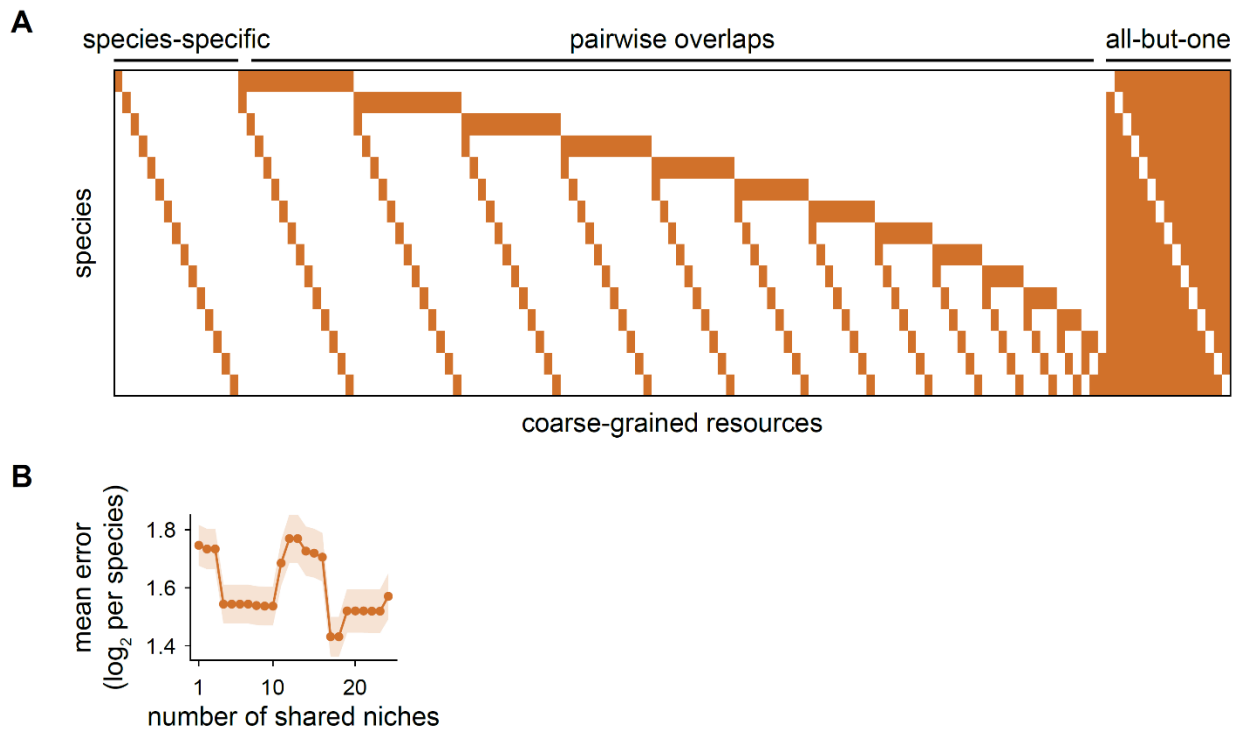

920

921 **Figure S3: Hypothetical structures of resource utilization failed to accurately**  
922 **predict assembly compositions.**

923 A) Hypothetical structures of resource utilization. The species-specific niches are  
924 consumed by only one species, and form the set of niches in the “base” structure.  
925 The pairwise overlaps are consumed by only two species. The all-but-one niches  
926 are consumed by 14 of the 15 species. Model performance using the base  
927 structure, the base structure with the pairwise overlaps, and the base structure  
928 with the set of all-but-one resources are shown in Fig. 3C.

929 B) Mean errors for the base structure plus a varying number of the largest remaining  
930 niches are shown. Shaded region denotes standard error of the mean.

931



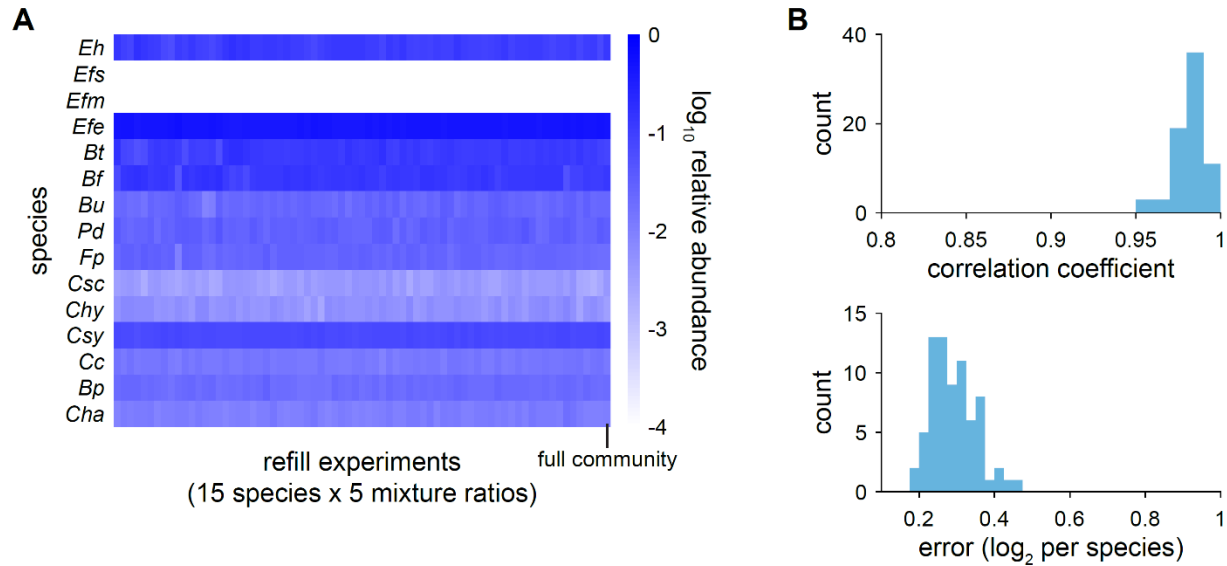

932

933

**Fig S4: Assembly compositions were independent of initial values.**

934

A) Relative abundances in “refilled” dropout assemblies. Each column represents one experiment, in which a dropout assembly with 14 of the 15 species was mixed with the monoculture of the species that was left out, at varying ratios (1:1, 1:10, 1:100, 1:1,000, and 1:10,000). All conditions (15 species × 5 ratios) are shown except for 3 experiments with idiosyncratic sequencing errors. The compositions were virtually indistinguishable from each other and from the full 15 member community, which is shown in the last column.

941

B) Histogram of the correlation coefficient (top) and error per species (bottom) between the species compositions in each refill experiment and the full 15 member community.

944

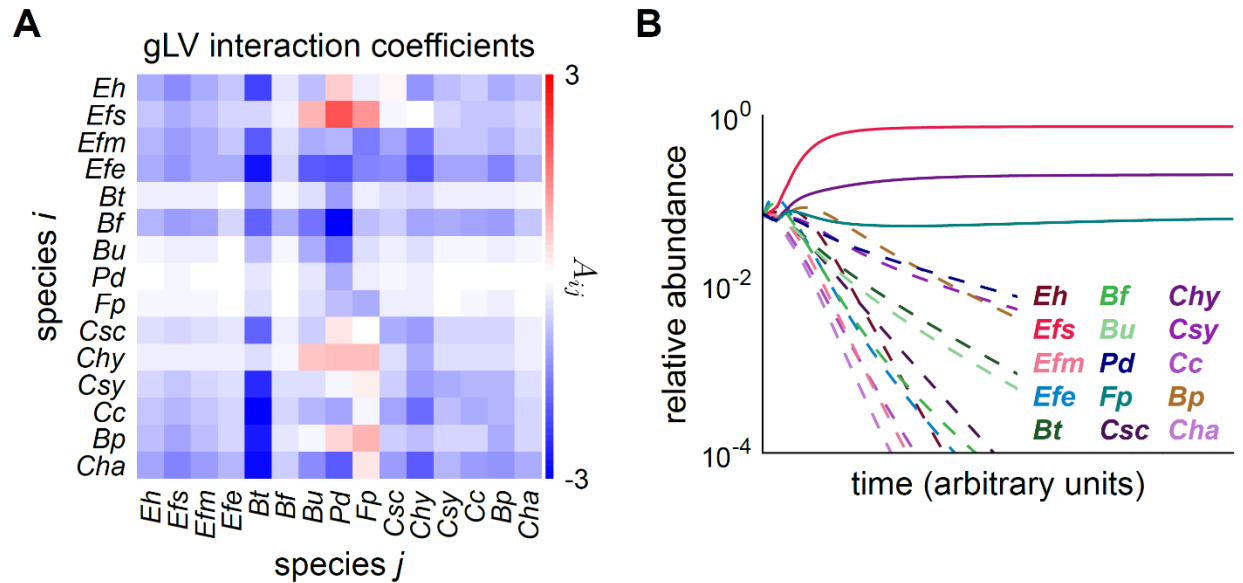

945

946 **Figure S5: A generalized Lotka-Volterra (gLV) model failed to accurately predict**  
947 **assembly compositions.**

948 A) The matrix of interaction coefficients inferred for growth in BHI is shown (Methods).

949 B) Model predictions for the dynamics of the community with all 15 species are  
950 shown. Only 3 species coexisted at steady state, in stark disagreement with  
951 experiment.

952

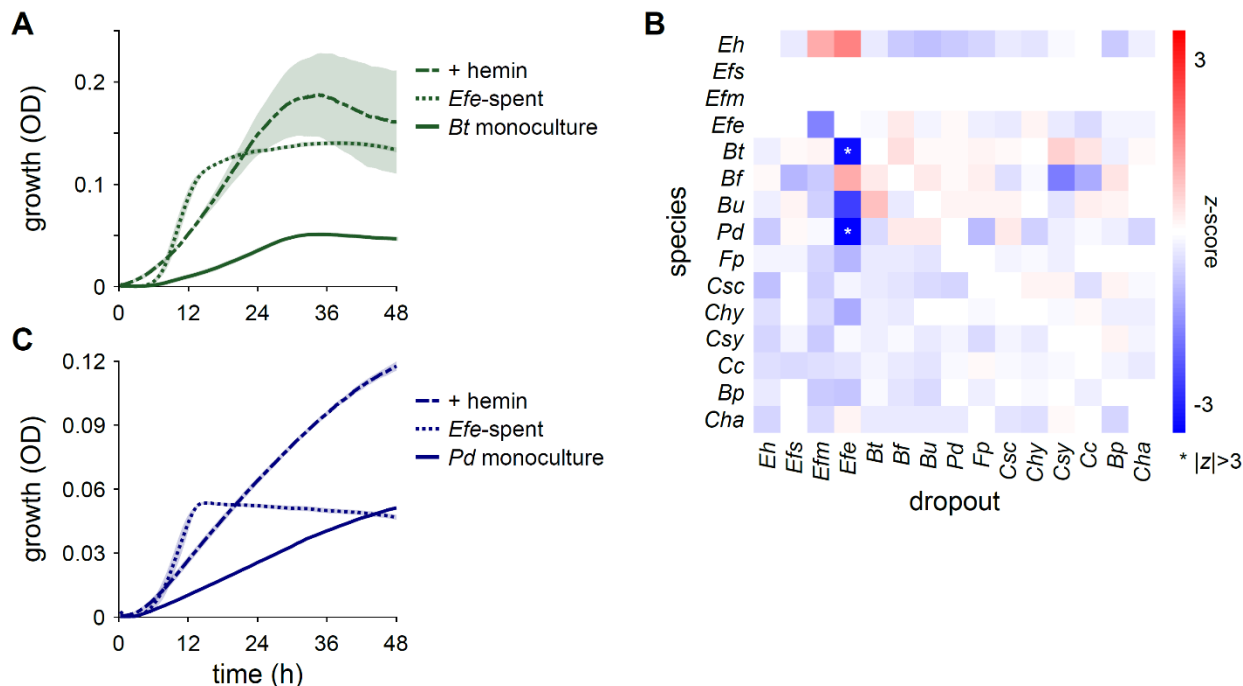

953

954 **Figure S6: Strong interactions in dropout assemblies were rare.**

955 A) Optical density (OD) over time for *Bt* grown in monoculture (solid line), in *Efe*-spent  
 956 medium (dotted line), and in fresh BHI plus hemin (dash dotted line). The mean  
 957 over 2-3 replicates is shown, and shading denotes standard error of the mean.

958 B) z-scores in dropout assemblies. Each column represents a dropout assembly of  
 959 14 of the 15 species, with the denoted species left out of the community. Each row  
 960 represents the z-scores calculated from the relative abundances of the denoted  
 961 species. z-scores are defined as  $z_{ij} := (x_{ij} - \mu_i) / \sigma_i$ , where  $x_{ij}$  is the  $\log_{10}$  relative  
 962 abundance of species  $i$  in the dropout assembly in which species  $j$  was left out,  
 963 and  $\mu_i$  and  $\sigma_i$  are the mean and standard deviation, respectively, of the  $\log_{10}$   
 964 relative abundance of species  $i$  across all dropout assemblies. z-scores with  
 965 absolute value larger than 3 are denoted by an asterisk.

966 C) Same as (a) but for *Pd*.

967

968 **REFERENCES**

- 969 Adamowicz, E.M., Flynn, J., Hunter, R.C., and Harcombe, W.R. (2018). Cross-feeding  
970 modulates antibiotic tolerance in bacterial communities. *The ISME Journal*, 12:2723-  
971 2735.
- 972 Alseekh, S., Aharoni, A., Brotman, Y., Contrepois, K., D'Auria, J., Ewald, J., C. Ewald,  
973 J., Fraser, P.D., Giavalisco, P., Hall, R.D., et al. (2021). Mass spectrometry-based  
974 metabolomics: a guide for annotation, quantification and best reporting practices.  
975 *Nature Methods*, 18:747-756.
- 976 Amarnath, K., Narla, A.V., Pontrelli, S., Dong, J., Caglar, T., Taylor, B.R., Schwartzman,  
977 J., Sauer, U., Cordero, O.X., and Hwa, T. (2021). Stress-induced cross-feeding of  
978 internal metabolites provides a dynamic mechanism of microbial cooperation. *bioRxiv*,  
979 2021.2006.2024.449802.
- 980 Aranda-Díaz, A., Ng, K.M., Thomsen, T., Real-Ramírez, I., Dahan, D., Dittmar, S.,  
981 Gonzalez, C.G., Chavez, T., Vasquez, K.S., Nguyen, T.H., et al. (2022). Establishment  
982 and characterization of stable, diverse, fecal-derived in vitro microbial communities that  
983 model the intestinal microbiota. *Cell Host & Microbe*, 30:260-272.
- 984 Aranda-Díaz, A., Obadia, B., Dodge, R., Thomsen, T., Hallberg, Z.F., Güvener, Z.T.,  
985 Ludington, W.B., and Huang, K.C. (2020). Bacterial interspecies interactions modulate  
986 pH-mediated antibiotic tolerance. *eLife*, 9:e51493.
- 987 Biggs, M.B., Medlock, G.L., Moutinho, T.J., Lees, H.J., Swann, J.R., Kolling, G.L., and  
988 Papin, J.A. (2017). Systems-level metabolism of the altered Schaedler flora, a complete  
989 gut microbiota. *The ISME Journal*, 11:426-438.
- 990 Cheng, A.G., Ho, P.-Y., Jain, S., Meng, X., Wang, M., Yu, F.B., Iakiviak, M.,  
991 Brumbaugh, A.R., Nagashima, K., Zhao, A., et al. (2021). *In vivo* augmentation of a  
992 complex gut bacterial community. *bioRxiv*, 2021.2006.2015.448620.
- 993 Chesson, P. (1990). MacArthur's consumer-resource model. *Theoretical Population*  
994 *Biology*, 37:26-38.
- 995 Cho, I., and Blaser, M.J. (2012). The human microbiome: at the interface of health and  
996 disease. *Nature Reviews Genetics*, 13:260-270.
- 997 Cordero, O.X., and Datta, M.S. (2016). Microbial interactions and community assembly  
998 at microscales. *Current Opinion in Microbiology*, 31:227-234.
- 999 Cui, W., Marsland, R., and Mehta, P. (2021). Diverse communities behave like typical  
1000 random ecosystems. *Physical Review E*, 104:034416.
- 1001 Dal Bello, M., Lee, H., Goyal, A., and Gore, J. (2021). Resource–diversity relationships  
1002 in bacterial communities reflect the network structure of microbial metabolism. *Nature*  
1003 *Ecology & Evolution*, 5:1424-1434.

- 1004 Erez, A., Lopez, J.G., Weiner, B.G., Meir, Y., and Wingreen, N.S. (2020). Nutrient levels  
1005 and trade-offs control diversity in a serial dilution ecosystem. *eLife*, 9:e57790.
- 1006 Faust, K., and Raes, J. (2012). Microbial interactions: from networks to models. *Nature*  
1007 *Reviews Microbiology*, 10:538-550.
- 1008 Fisher, C.K., and Mehta, P. (2014). Identifying keystone species in the human gut  
1009 microbiome from metagenomic timeseries using sparse linear regression. *PLoS One*,  
1010 9:e102451.
- 1011 Foster, Kevin R., and Bell, T. (2012). Competition, not cooperation, dominates  
1012 interactions among culturable microbial species. *Current Biology*, 22:1845-1850.
- 1013 Good, B.H., Martis, S., and Hallatschek, O. (2018). Adaptation limits ecological  
1014 diversification and promotes ecological tinkering during the competition for substitutable  
1015 resources. *Proceedings of the National Academy of Sciences*, 115:E10407-E10416.
- 1016 Gowda, K., Ping, D., Mani, M., and Kuehn, S. (2022). Genomic structure predicts  
1017 metabolite dynamics in microbial communities. *Cell*, 185:530-546.e525.
- 1018 Halpern, D., and Gruss, A. (2015). A sensitive bacterial-growth-based test reveals how  
1019 intestinal *Bacteroides* meet their porphyrin requirement. *BMC Microbiology*, 15:282.
- 1020 Hammarlund, S.P., Gedeon, T., Carlson, R.P., and Harcombe, W.R. (2021). Limitation  
1021 by a shared mutualist promotes coexistence of multiple competing partners. *Nature*  
1022 *Communications*, 12:619.
- 1023 Han, S., Van Treuren, W., Fischer, C.R., Merrill, B.D., DeFelice, B.C., Sanchez, J.M.,  
1024 Higginbottom, S.K., Guthrie, L., Fall, L.A., Dodd, D., et al. (2021). A metabolomics  
1025 pipeline for the mechanistic interrogation of the gut microbiome. *Nature*, 595:415-420.
- 1026 Hart, S.F.M., Mi, H., Green, R., Xie, L., Pineda, J.M.B., Momeni, B., and Shou, W.  
1027 (2019). Uncovering and resolving challenges of quantitative modeling in a simplified  
1028 community of interacting cells. *PLoS Biology* 17:e3000135.
- 1029 Ho, P.-Y., Good, B.H., and Huang, K.C. (2022). Competition for fluctuating resources  
1030 reproduces statistics of species abundance over time across wide-ranging microbiotas.  
1031 *eLife*, 11:e75168
- 1032 Hryckowian, A.J., Van Treuren, W., Smits, S.A., Davis, N.M., Gardner, J.O., Bouley,  
1033 D.M., and Sonnenburg, J.L. (2018). Microbiota-accessible carbohydrates suppress  
1034 *Clostridium difficile* infection in a murine model. *Nature Microbiology*, 3:662-669.
- 1035 Jacobson, A., Lam, L., Rajendram, M., Tamburini, F., Honeycutt, J., Pham, T., Van  
1036 Treuren, W., Pruss, K., Stabler, S.R., Lugo, K., et al. (2018). A gut commensal-  
1037 produced metabolite mediates colonization resistance to *Salmonella* infection. *Cell Host*  
1038 *& Microbe*, 25:296-307.e297.

- 1039 Kehe, J., Ortiz, A., Kulesa, A., Gore, J., Blainey Paul, C., and Friedman, J. Positive  
1040 interactions are common among culturable bacteria. *Science Advances*, 7:eabi7159.
- 1041 Medlock, G.L., Carey, M.A., McDuffie, D.G., Mundy, M.B., Giallourou, N., Swann, J.R.,  
1042 Kolling, G.L., and Papin, J.A. (2018). Inferring metabolic mechanisms of interaction  
1043 within a defined gut microbiota. *Cell Systems*, 7:245-257.e247.
- 1044 Momeni, B., Xie, L., and Shou, W. (2017). Lotka-Volterra pairwise modeling fails to  
1045 capture diverse pairwise microbial interactions. *eLife*, 6:e25051.
- 1046 Ng, K.M., Aranda-Díaz, A., Tropini, C., Frankel, M.R., Van Treuren, W., O’Laughlin,  
1047 C.T., Merrill, B.D., Yu, F.B., Pruss, K.M., and Oliveira, R.A. (2019). Recovery of the gut  
1048 microbiota after antibiotics depends on host diet, community context, and environmental  
1049 reservoirs. *Cell Host & Microbe*, 26:650-665.
- 1050 Niehaus, L., Boland, I., Liu, M., Chen, K., Fu, D., Henckel, C., Chaung, K., Miranda,  
1051 S.E., Dyckman, S., Crum, M., et al. (2019). Microbial coexistence through chemical-  
1052 mediated interactions. *Nature Communications*, 10:2052.
- 1053 Piccardi, P., Vessman, B., and Mitri, S. (2019). Toxicity drives facilitation between 4  
1054 bacterial species. *Proceedings of the National Academy of Sciences*, 116:15979-15984.
- 1055 Ratzke, C., and Gore, J. (2018). Modifying and reacting to the environmental pH can  
1056 drive bacterial interactions. *PLoS Biology*, 16:e2004248.
- 1057 Showalter, M.R., Nonnecke, E.B., Linderholm, A.L., Cajka, T., Sa, M.R., Lönnerdal, B.,  
1058 Kenyon, N.J., and Fiehn, O. (2018). Obesogenic diets alter metabolism in mice. *PLoS*  
1059 *One*, 13:e0190632.
- 1060 Singh, B.K., Trivedi, P., Egidi, E., Macdonald, C.A., and Delgado-Baquerizo, M. (2020).  
1061 Crop microbiome and sustainable agriculture. *Nature Reviews Microbiology*, 18:601-  
1062 602.
- 1063 Tikhonov, M., and Monasson, R. (2017). Collective phase in resource competition in a  
1064 highly diverse ecosystem. *Physical Review Letters*, 118:048103.
- 1065 Tsugawa, H., Cajka, T., Kind, T., Ma, Y., Higgins, B., Ikeda, K., Kanazawa, M.,  
1066 VanderGheynst, J., Fiehn, O., and Arita, M. (2015). MS-DIAL: data-independent MS/MS  
1067 deconvolution for comprehensive metabolome analysis. *Nature Methods*, 12:523-526.
- 1068 Tsugawa, H., Ikeda, K., Takahashi, M., Satoh, A., Mori, Y., Uchino, H., Okahashi, N.,  
1069 Yamada, Y., Tada, I., Bonini, P., et al. (2020). A lipidome atlas in MS-DIAL 4. *Nature*  
1070 *Biotechnology*, 38:1159-1163.
- 1071 Venturelli, O.S., Carr, A.V., Fisher, G., Hsu, R.H., Lau, R., Bowen, B.P., Hromada, S.,  
1072 Northen, T., and Arkin, A.P. (2018). Deciphering microbial interactions in synthetic  
1073 human gut microbiome communities. *Molecular Systems Biology*, 14:e8157.

- 1074 Verster, A.J., Ross, B.D., Radey, M.C., Bao, Y., Goodman, A.L., Mougous, J.D., and  
1075 Borenstein, E. (2017). The landscape of type VI secretion across human gut  
1076 microbiomes reveals its role in community composition. *Cell Host & Microbe*, 22:411-  
1077 419.e414.
- 1078 Weiss, A.S., Burrichter, A.G., Durai Raj, A.C., von Stempel, A., Meng, C., Kleigrewe,  
1079 K., Münch, P.C., Rössler, L., Huber, C., Eisenreich, W., et al. (2021). *In vitro* interaction  
1080 network of a synthetic gut bacterial community. *The ISME Journal*, 16:1095-1109.
- 1081 Widder, S., Allen, R.J., Pfeiffer, T., Curtis, T.P., Wiuf, C., Sloan, W.T., Cordero, O.X.,  
1082 Brown, S.P., Momeni, B., Shou, W., et al. (2016). Challenges in microbial ecology:  
1083 building predictive understanding of community function and dynamics. *The ISME*  
1084 *Journal*, 10:2557-2568.
- 1085 Xiao, Y., Angulo, M.T., Friedman, J., Waldor, M.K., Weiss, S.T., and Liu, Y.-Y. (2017).  
1086 Mapping the ecological networks of microbial communities. *Nature Communications*,  
1087 8:2042.
- 1088
